# Supplementary material
Source: PubMed Central journal article supplement (PMC7461615)
Supplement: NIHMS1615629-supplement-2.pdf [file NIHMS1615629-supplement-2.pdf]

A

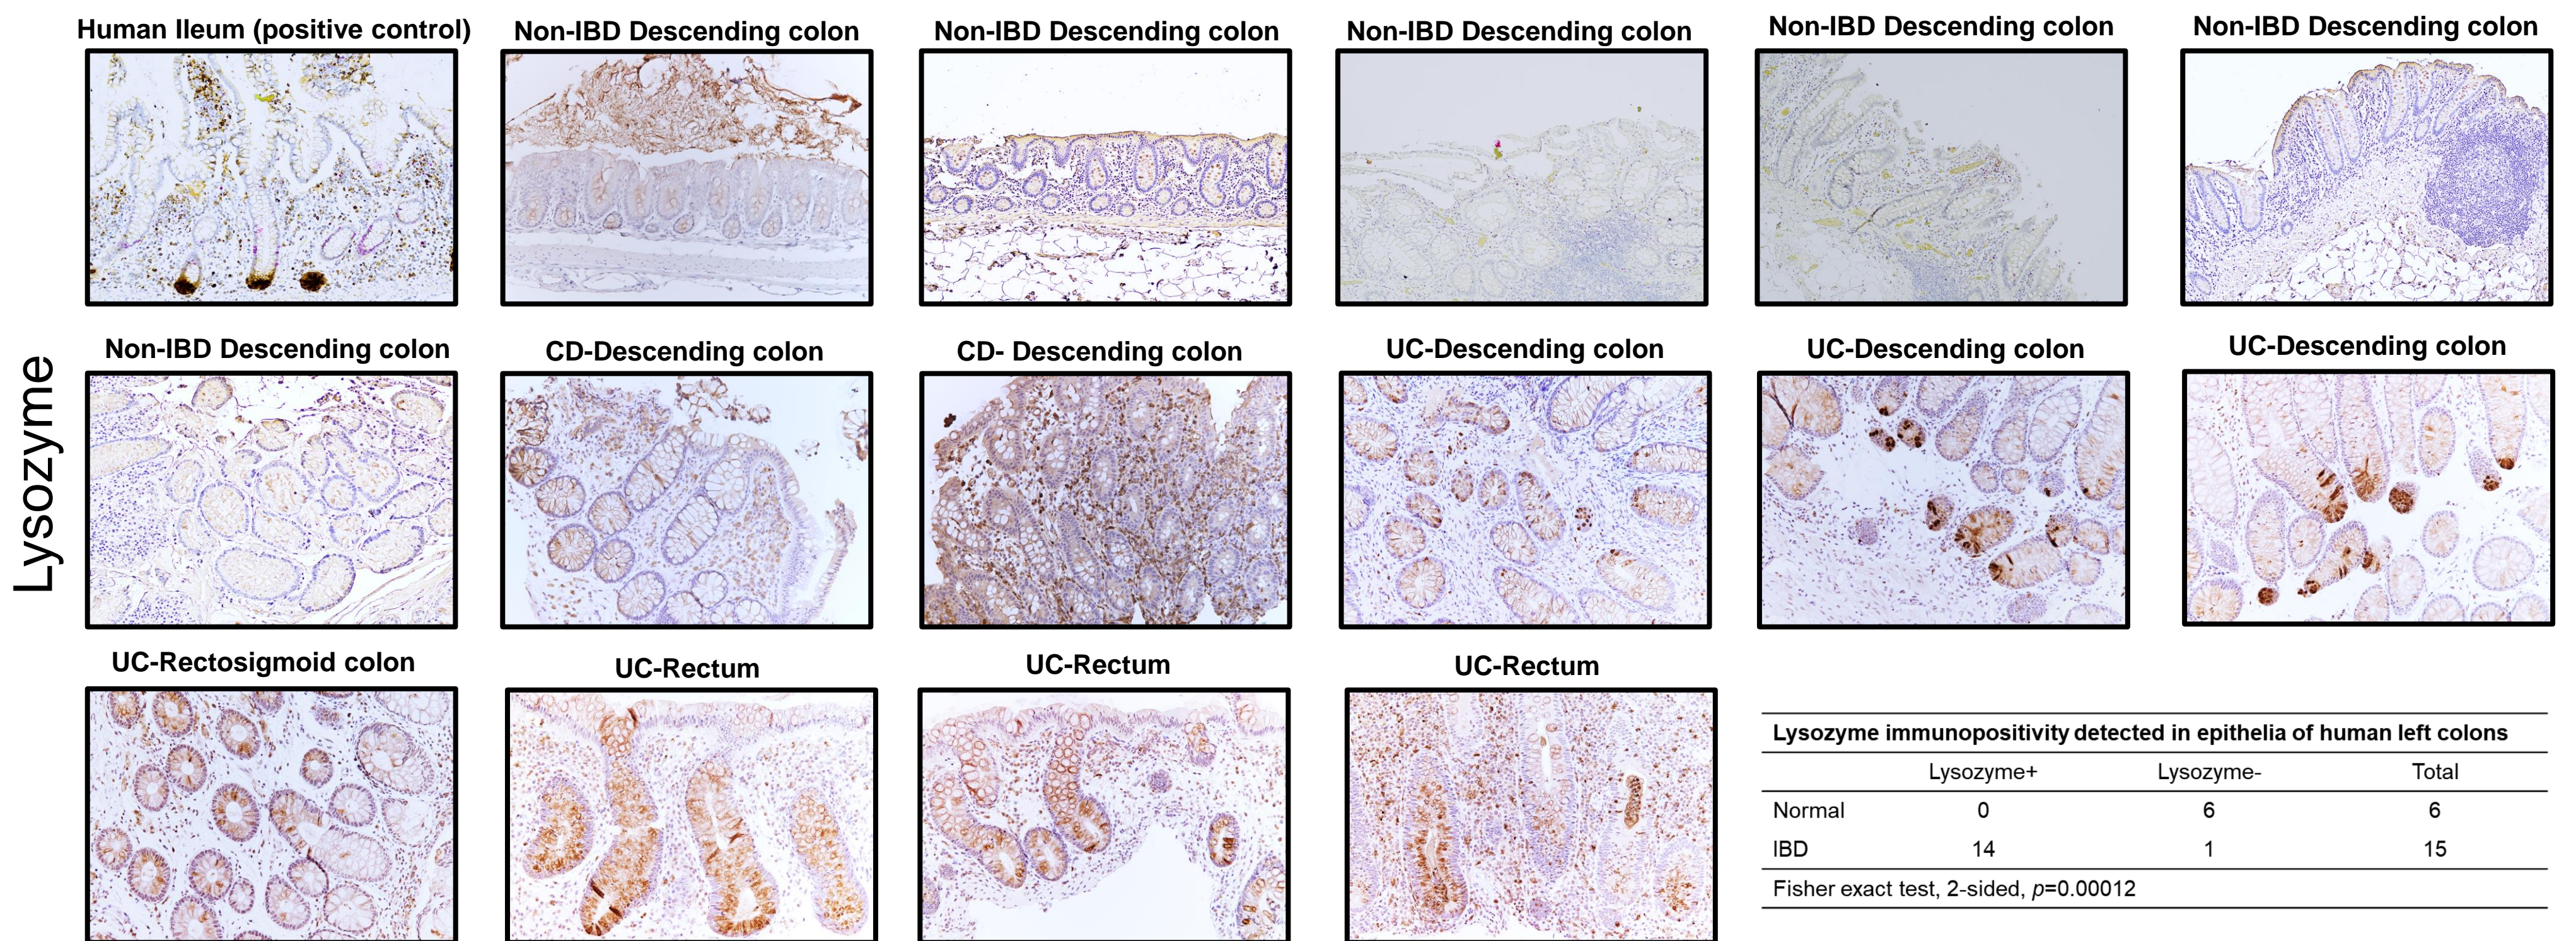

B

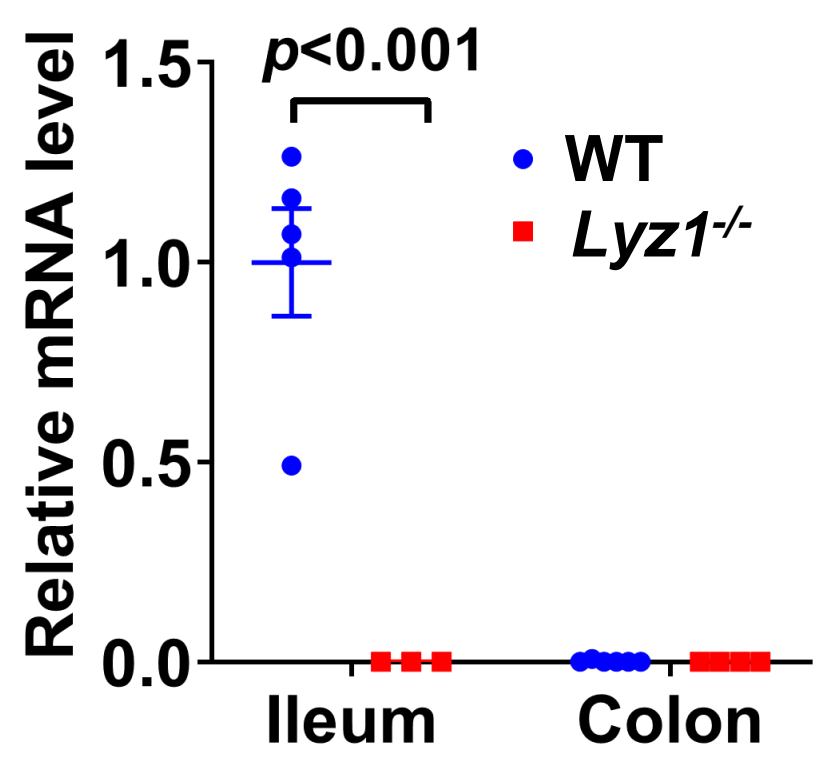

C

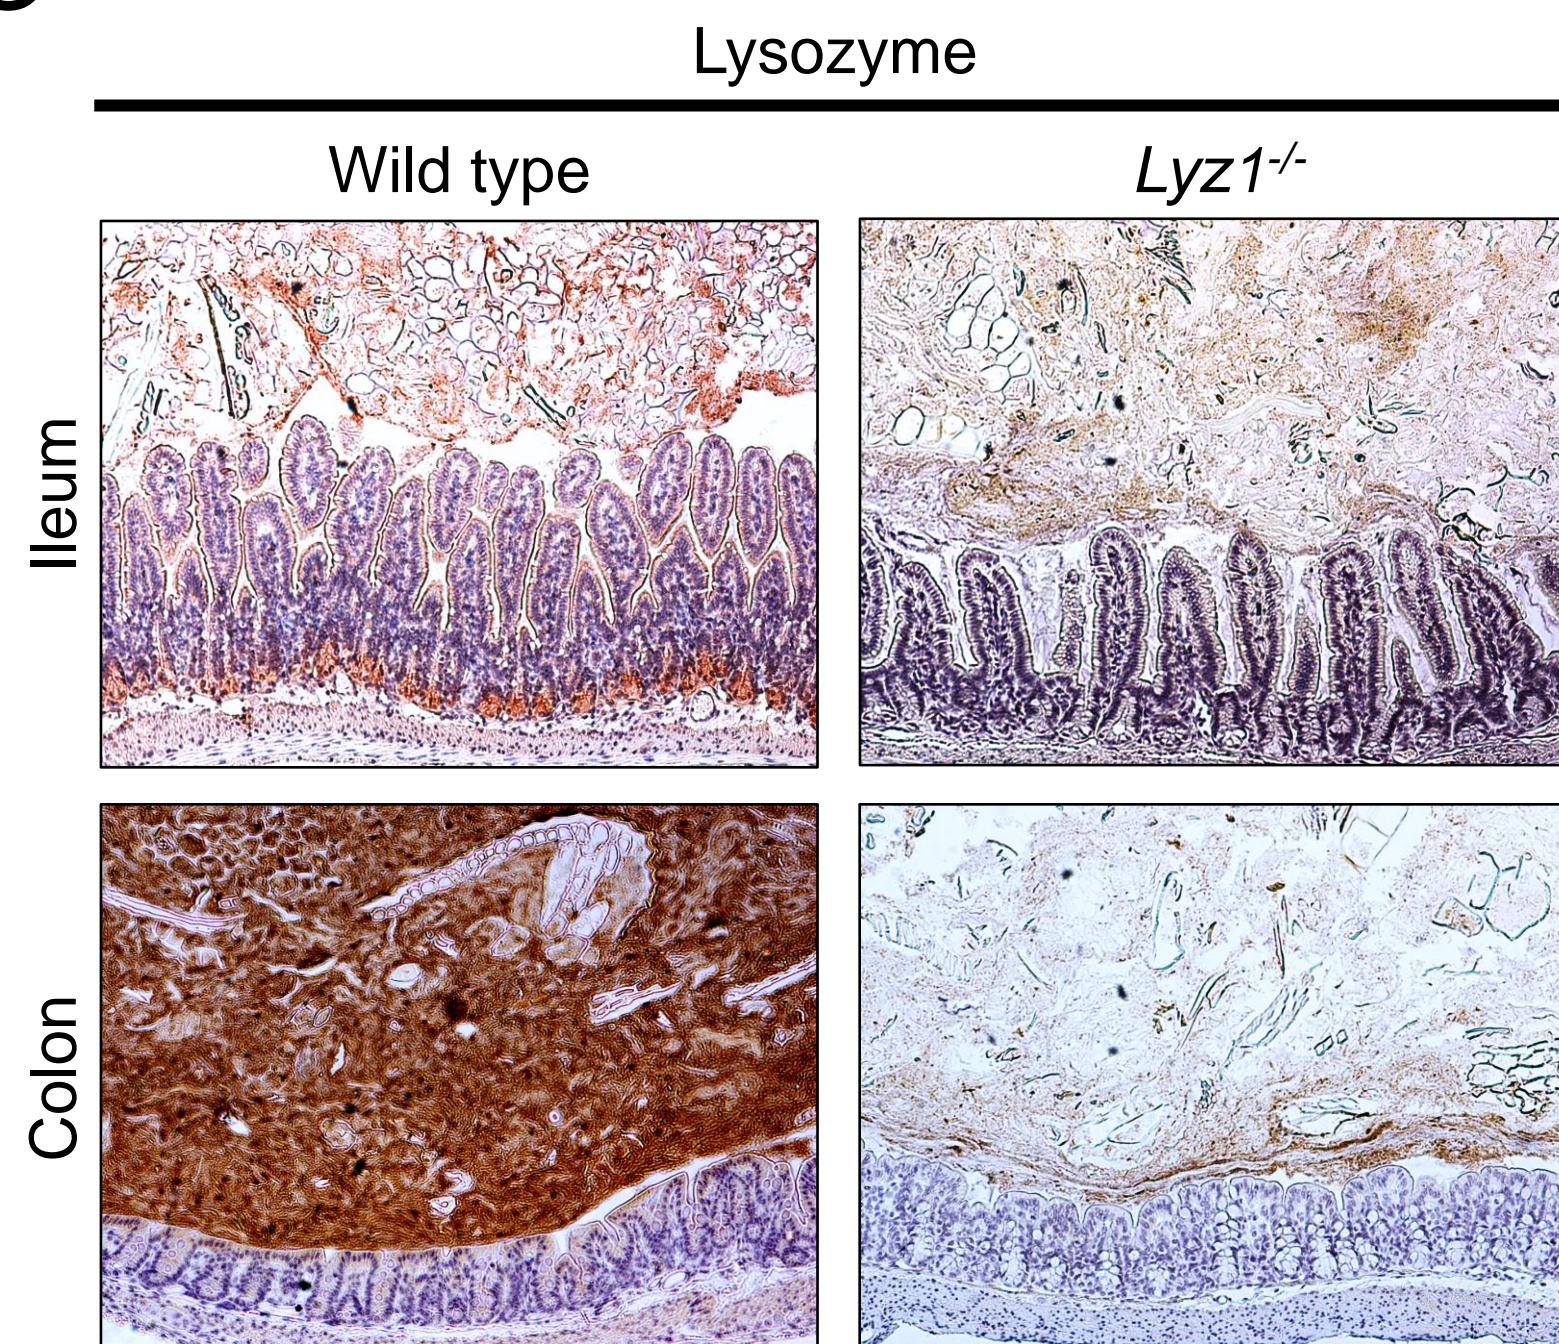

E

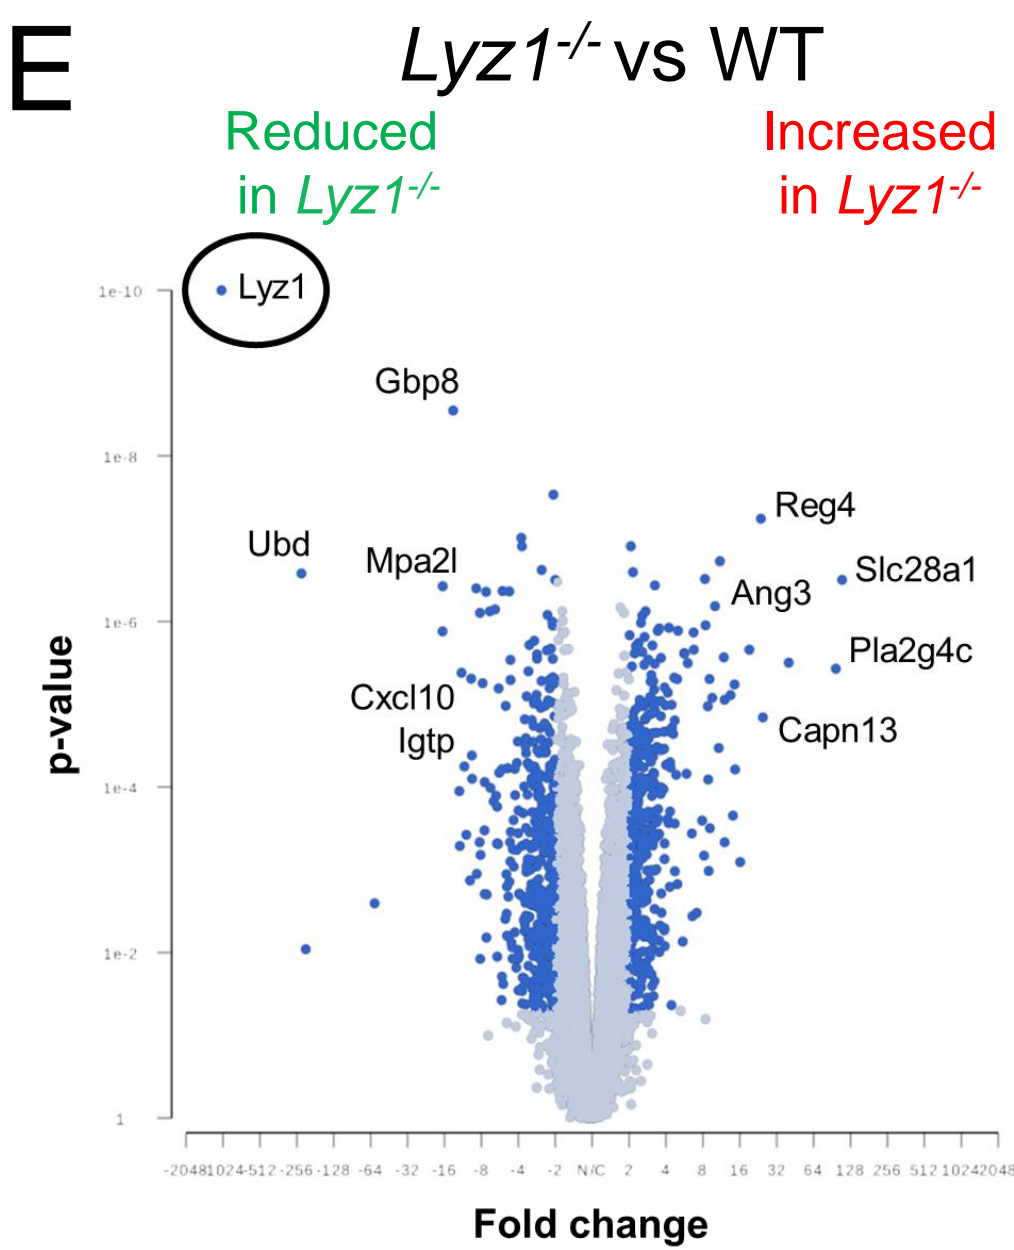

F

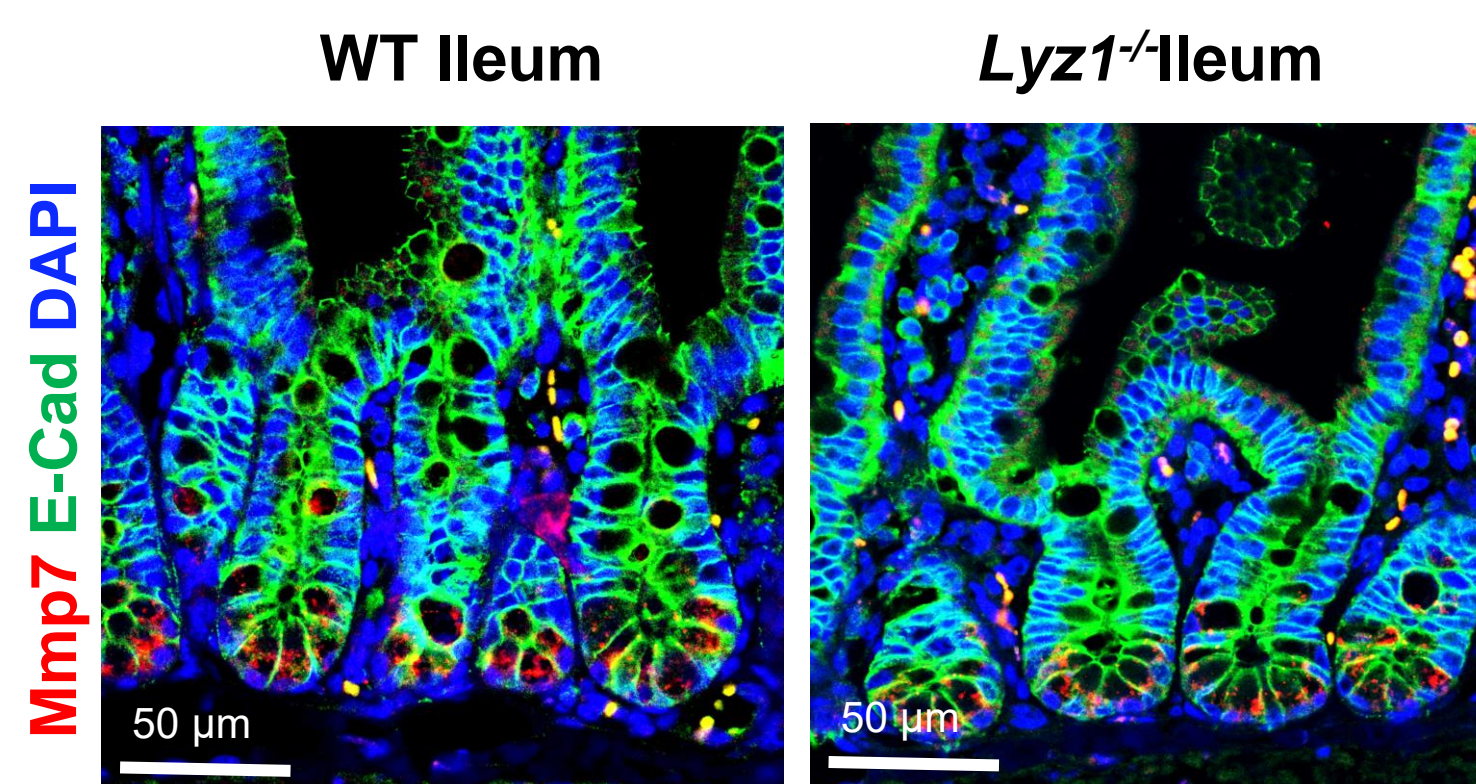

D

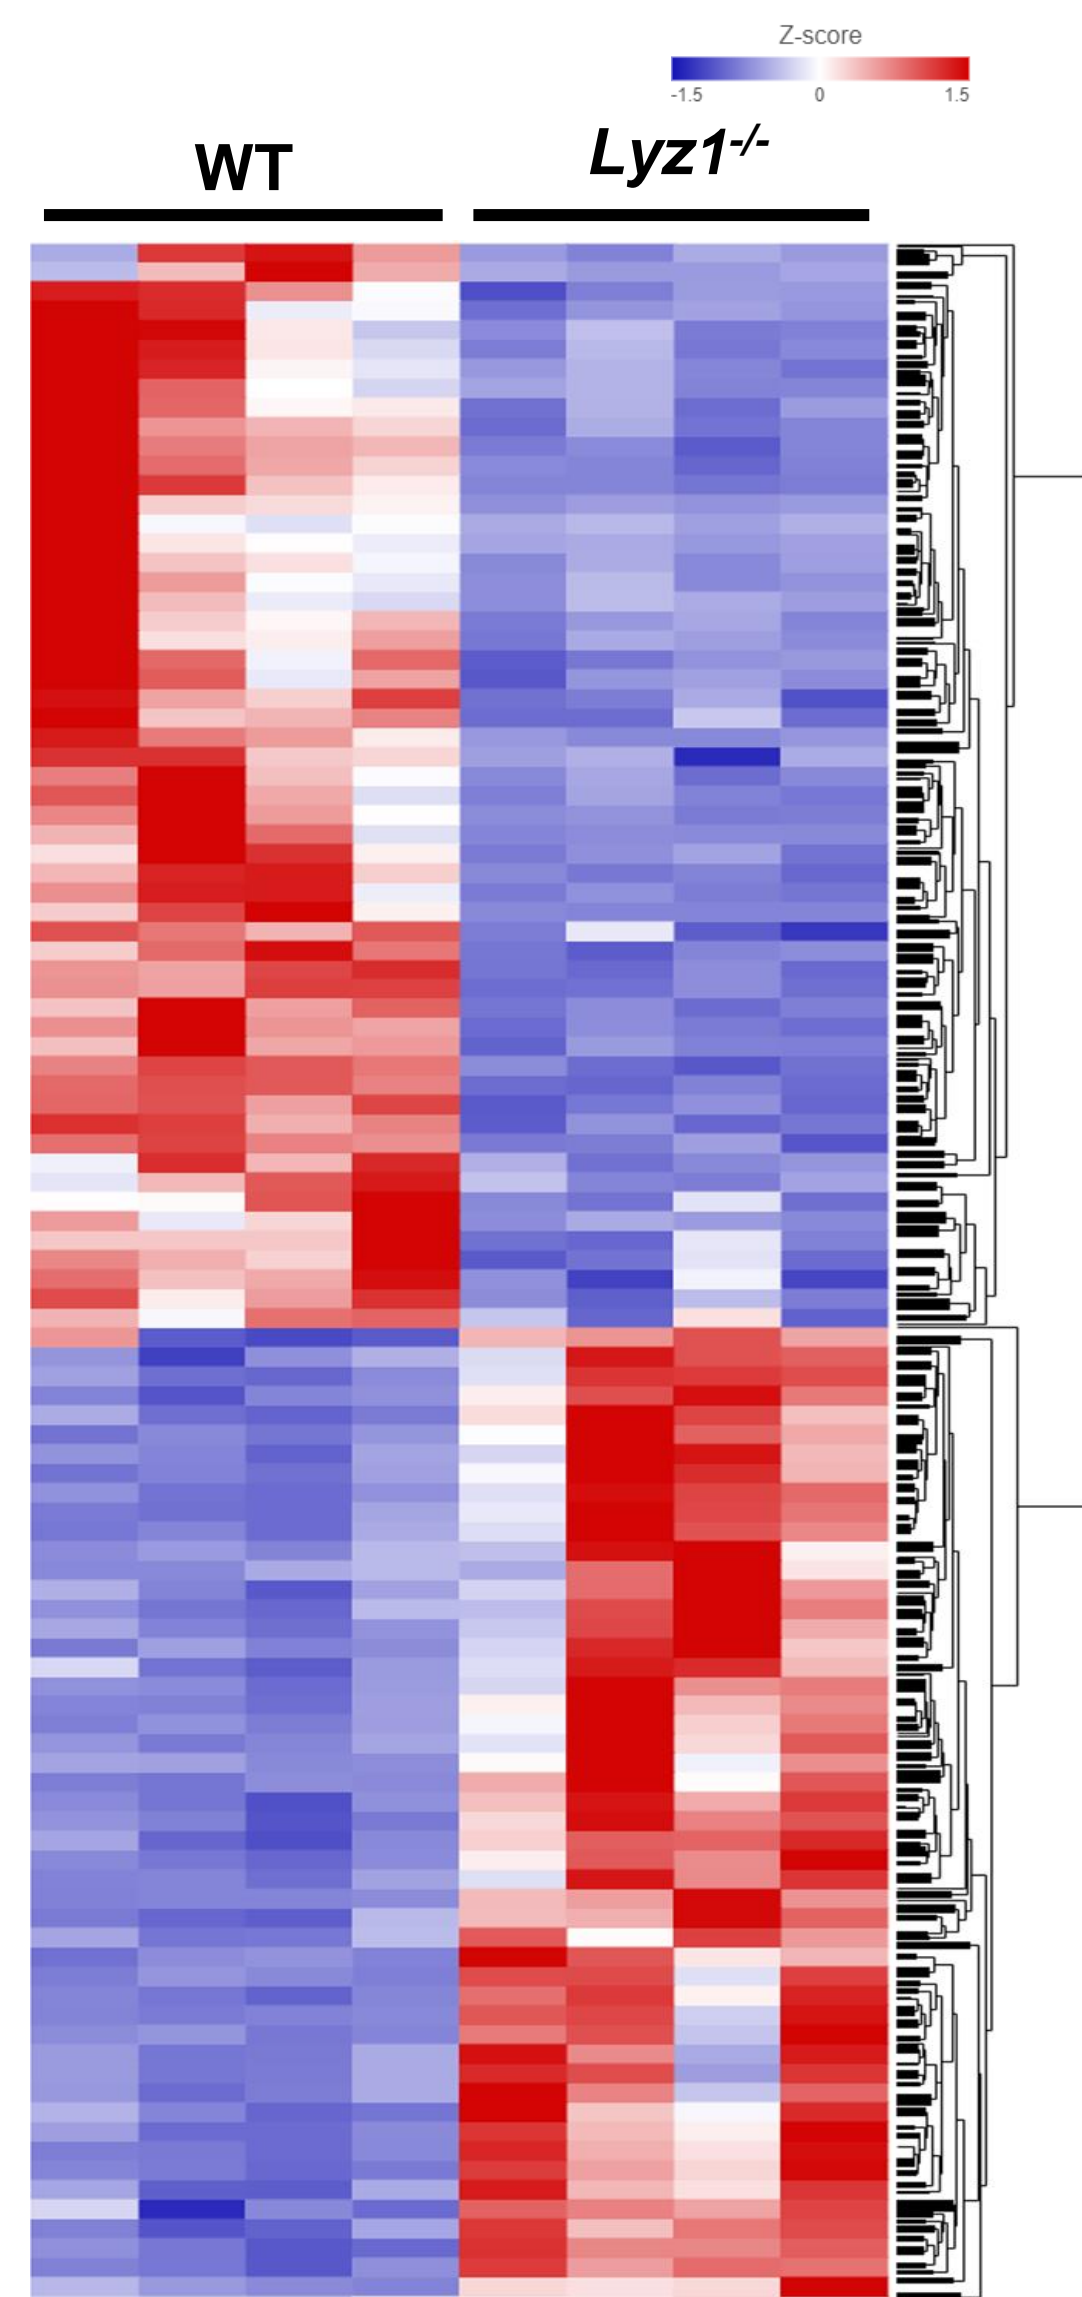

G

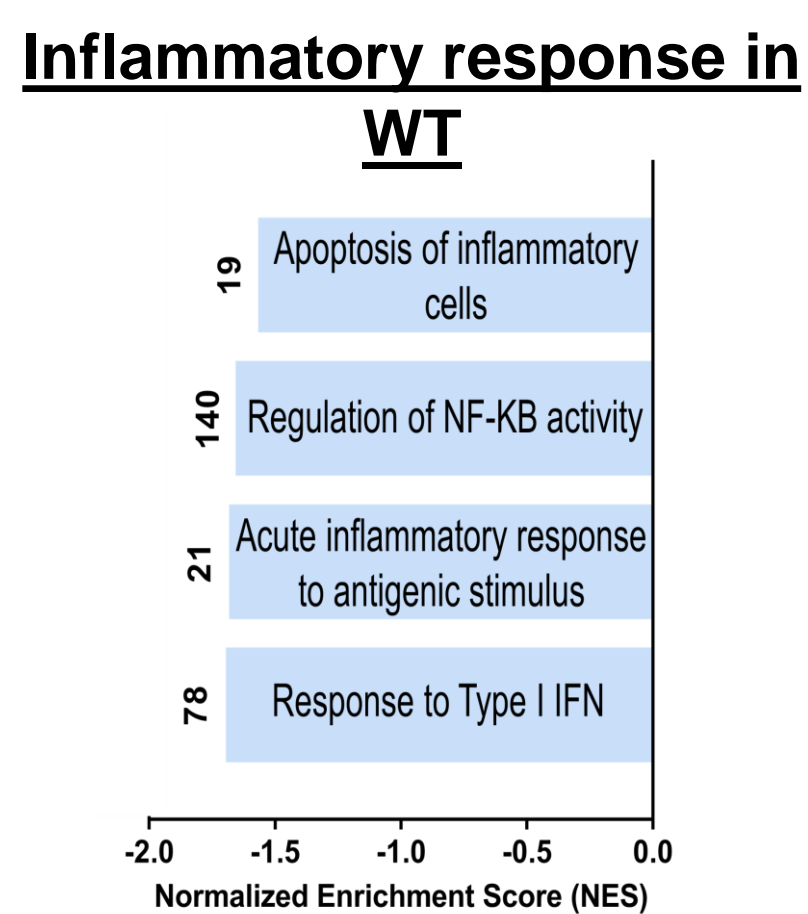

H

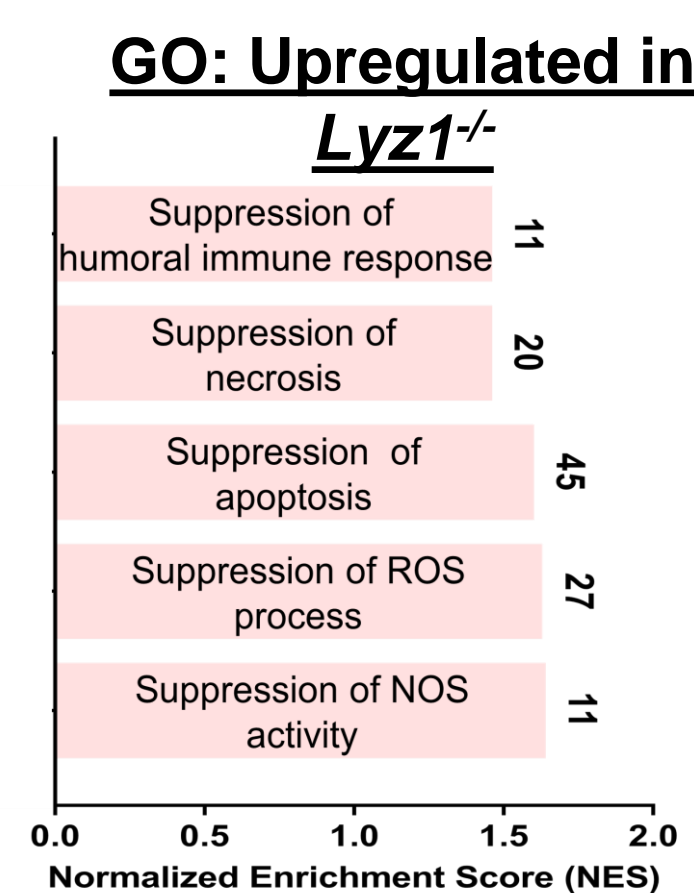

I

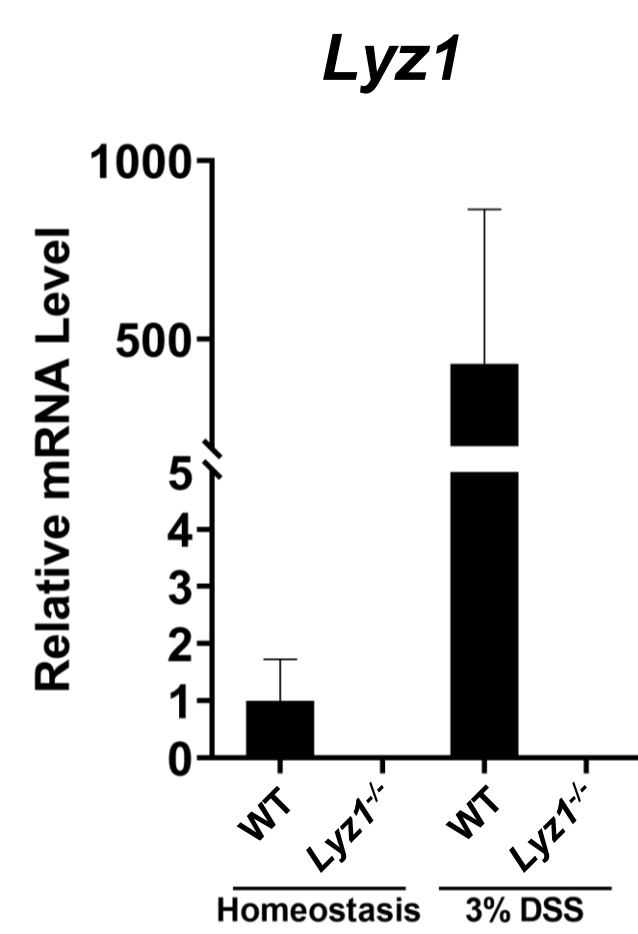

J

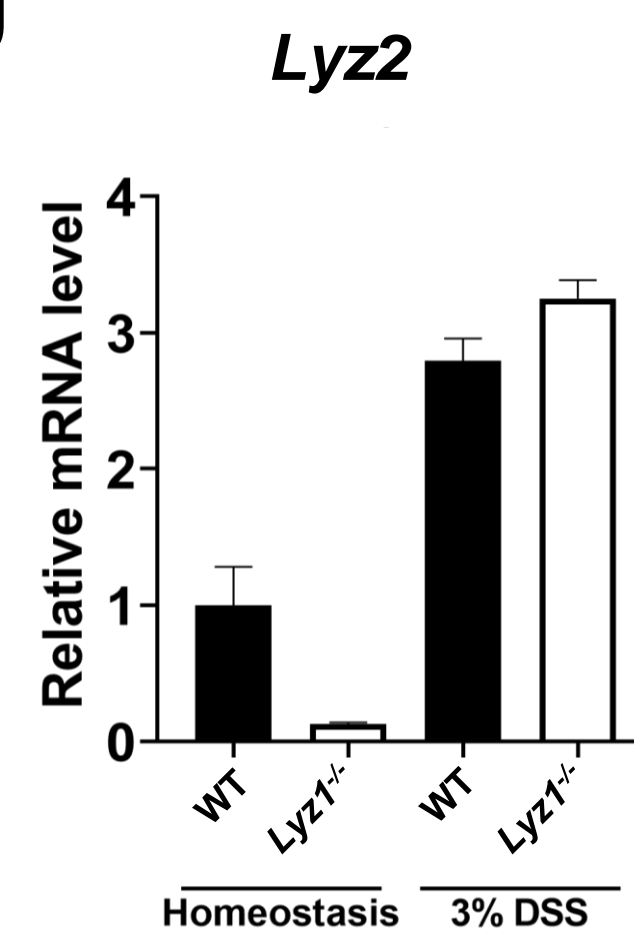

K

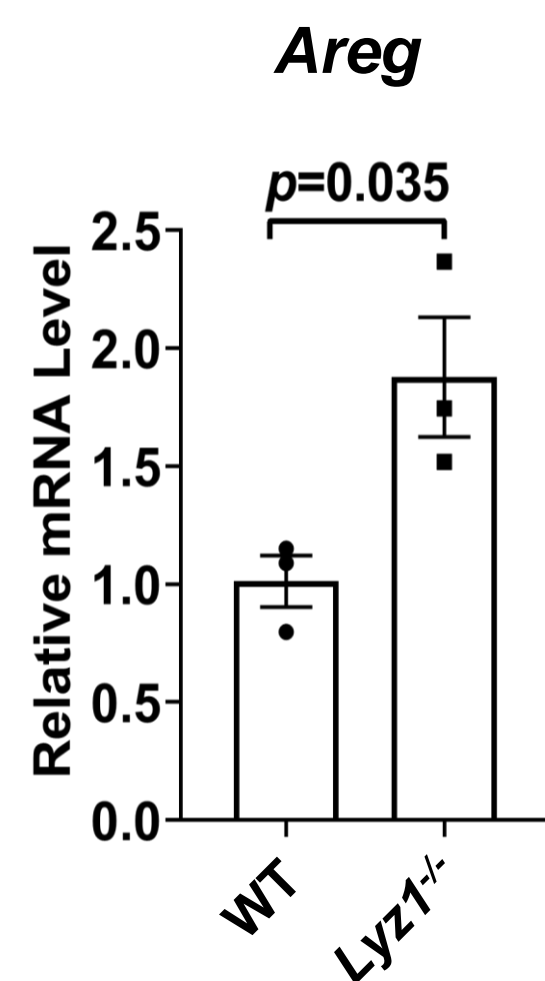



**Fig. S1. *Lyz1* deficiency reduces inflammation during experimental colitis, Related to Figure 1.**

**(A)** 15 IBD pathology cases of indicated anatomic region and 6 non-IBD colon tissues were stained for lysozyme to identify lysozyme-positive metaplastic Paneth cells. **(B)** qPCR analysis of *Lyz1* mRNA in WT and *Lyz1*<sup>-/-</sup> ileum and colon (N=3-5 mice for each genotype). **(C)** Representative immunostaining of lysozyme in the ileum and colon of WT and *Lyz1*<sup>-/-</sup> mice (N=3 mice per genotype). **(D)** Differential expression of genes in WT and *Lyz1*<sup>-/-</sup> ileum (N=4 mice per genotype). **(E)** Volcano plot of differentially expressed genes in WT and *Lyz1*<sup>-/-</sup> ileum. Blue color: genes with fold change < -2 or > 2; p-value < 0.05 (N= 4 mice per genotype). **(F)** Immunostaining of *Mmp7* in WT and *Lyz1*<sup>-/-</sup> ileum (N=3 mice per genotype). **(G)** GSEA of RNA-seq data revealed an increase in the pathways mentioned in WT ileum. Numbers above the bar graphs represent the number of genes from the WT dataset included within the GSEA gene set (N=4 mice). **(H)** Gene ontology analysis of RNA-seq data revealed gene sets upregulated in *Lyz1*<sup>-/-</sup> ileum. Numbers above the bar graphs represent the number of genes from the *Lyz1*<sup>-/-</sup> dataset included within the GSEA gene set (N=4 mice). **(I, J)** Real-time PCR analysis of *Lyz1* **(I)** and *Lyz2* **(J)** displayed induction of these genes in inflamed colon tissues of WT mice. In KO mice, only *Lyz2* was induced in DSS-treated WT and *Lyz1*<sup>-/-</sup> mouse colons (N=3-6 mice per genotype per condition). **(K)** Real-time PCR analysis of *Areg* in DSS-treated *Lyz1*<sup>-/-</sup> colons (N=3 mice per genotype). All bar graphs display mean ± SEM.



A

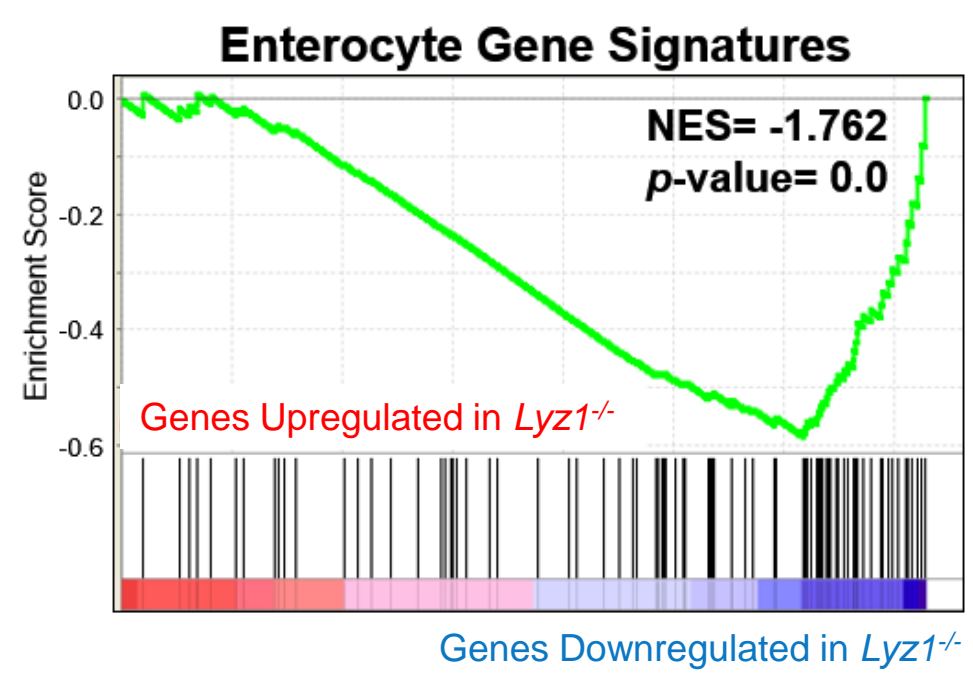

B

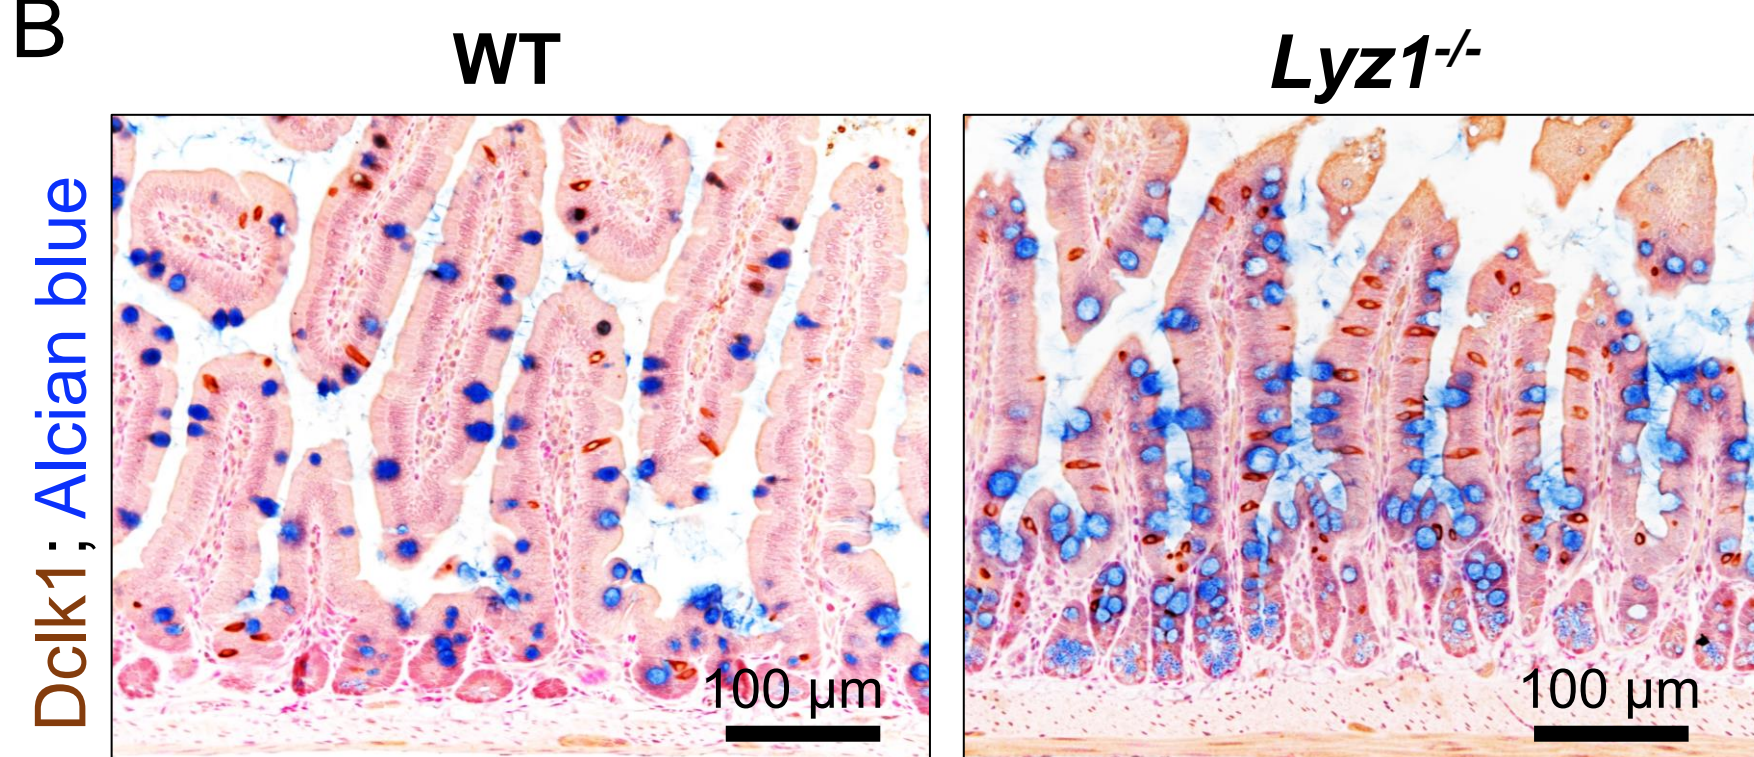

C

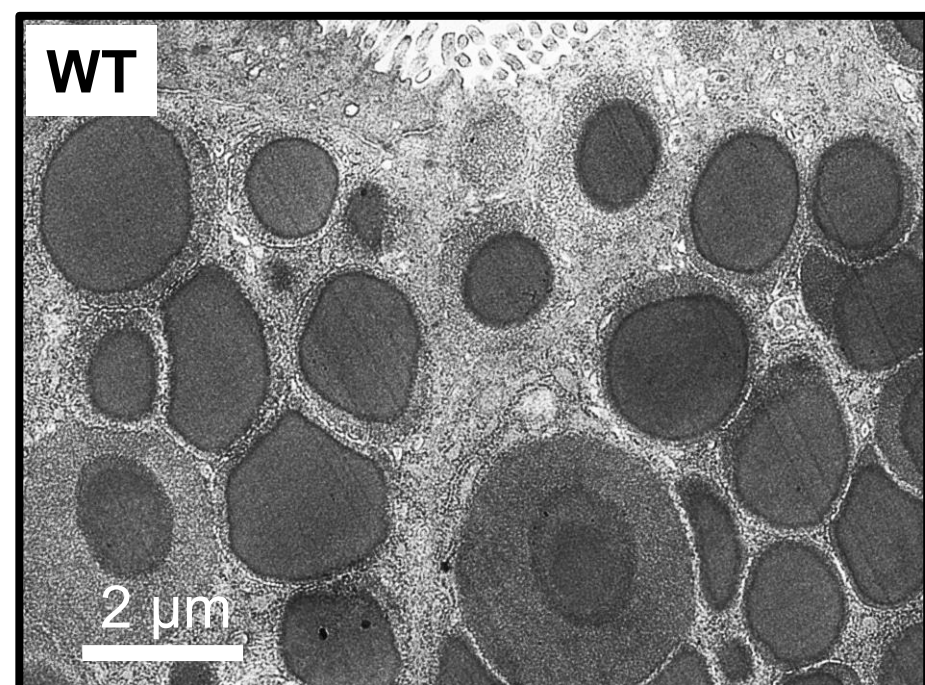

D

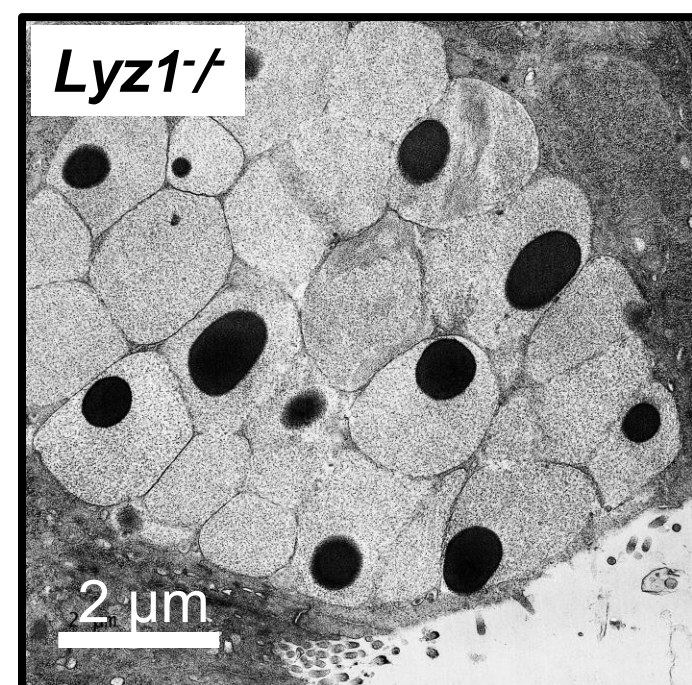

E

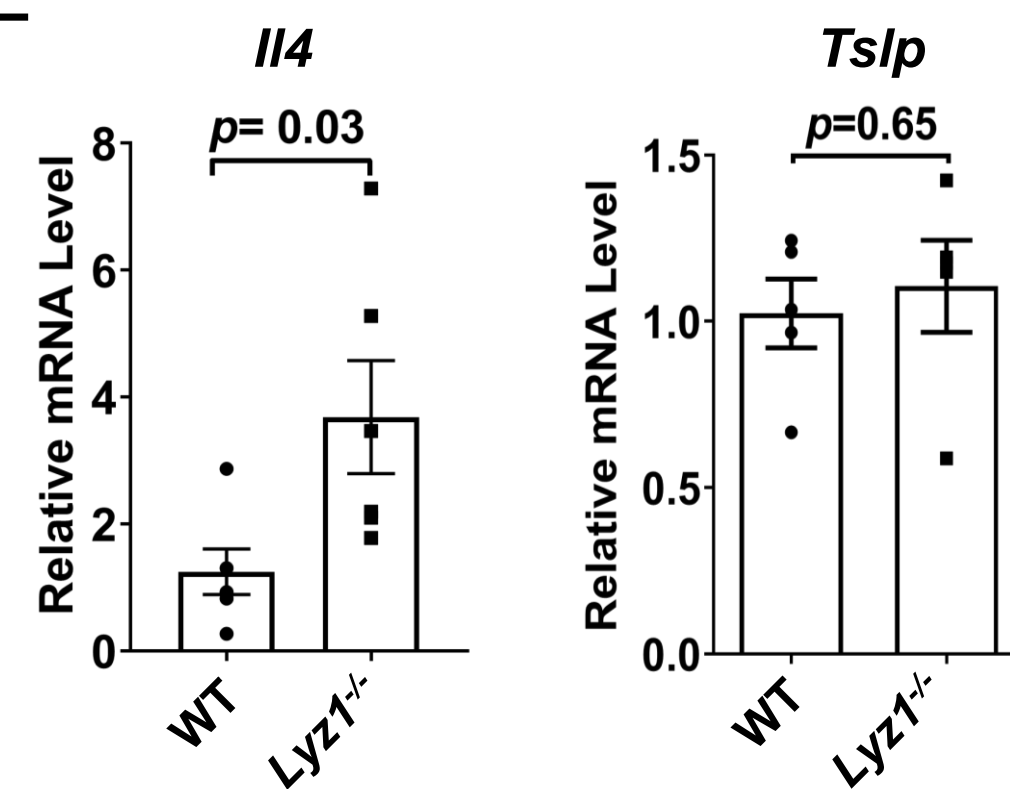

F

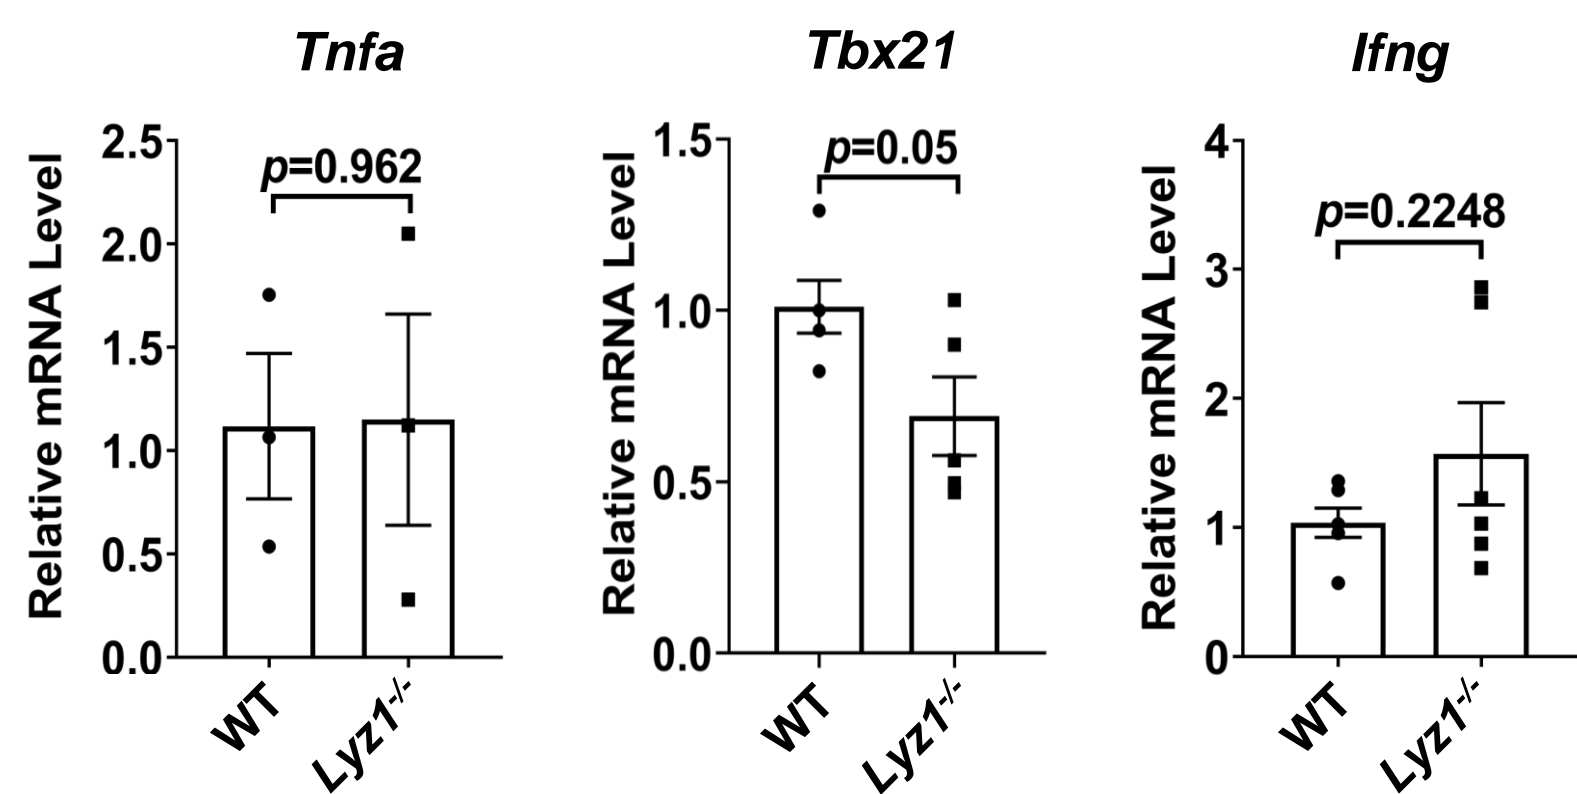

G

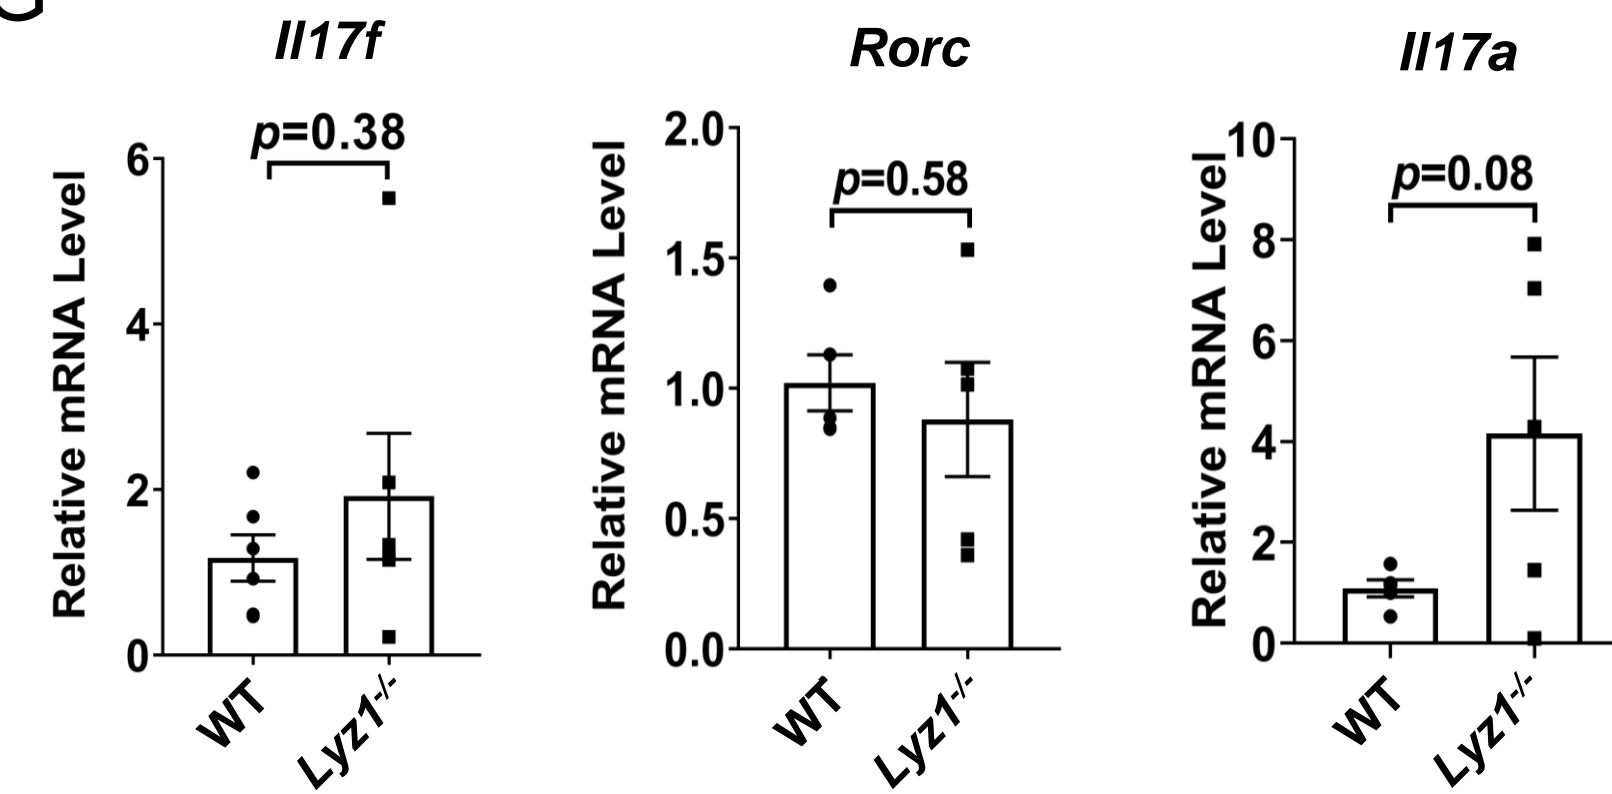

H

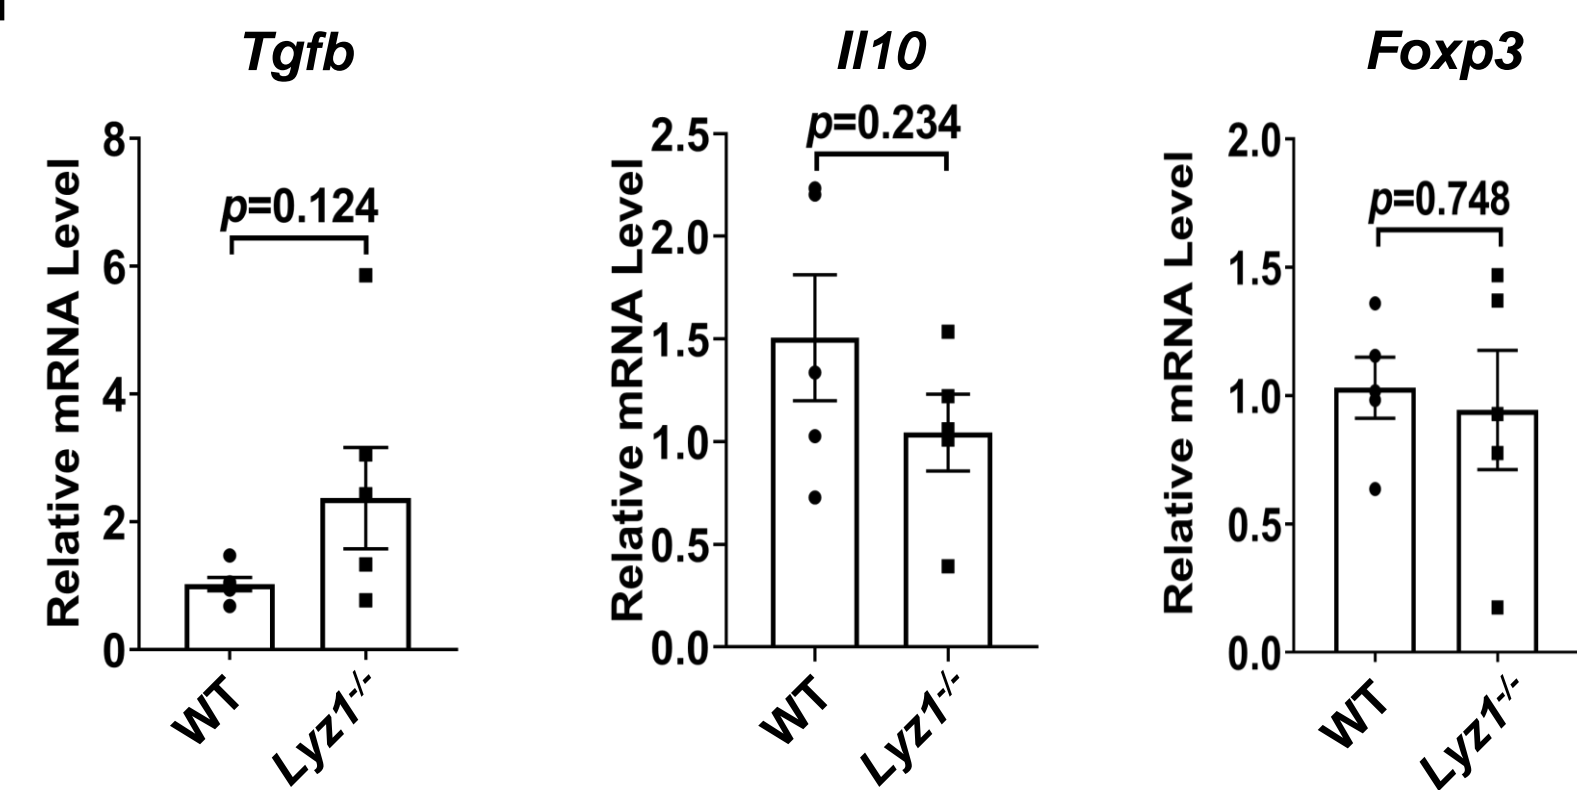

I

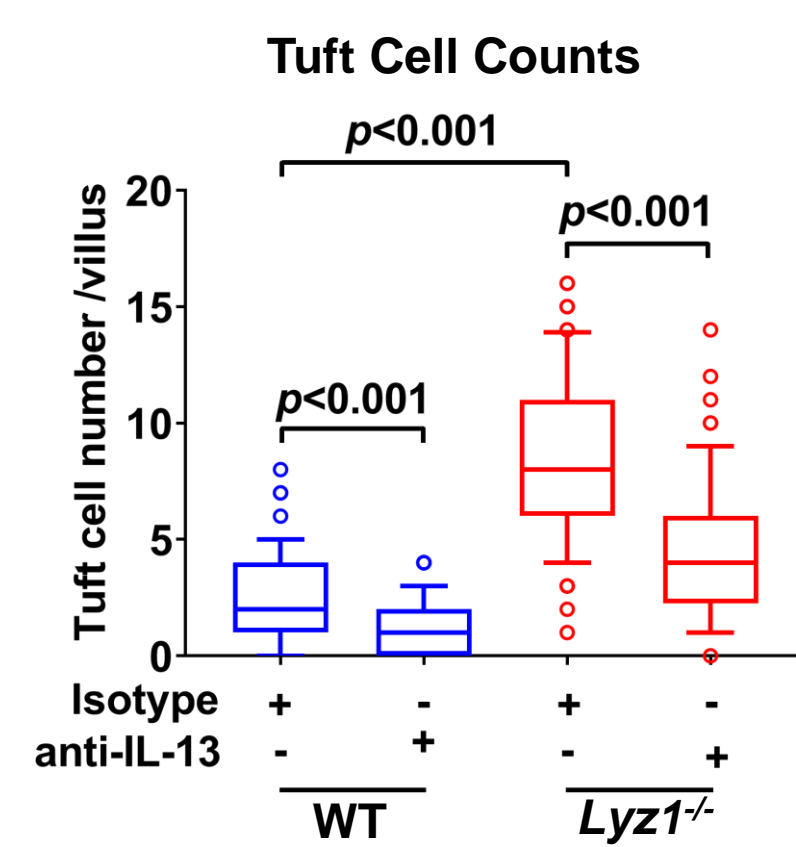

J

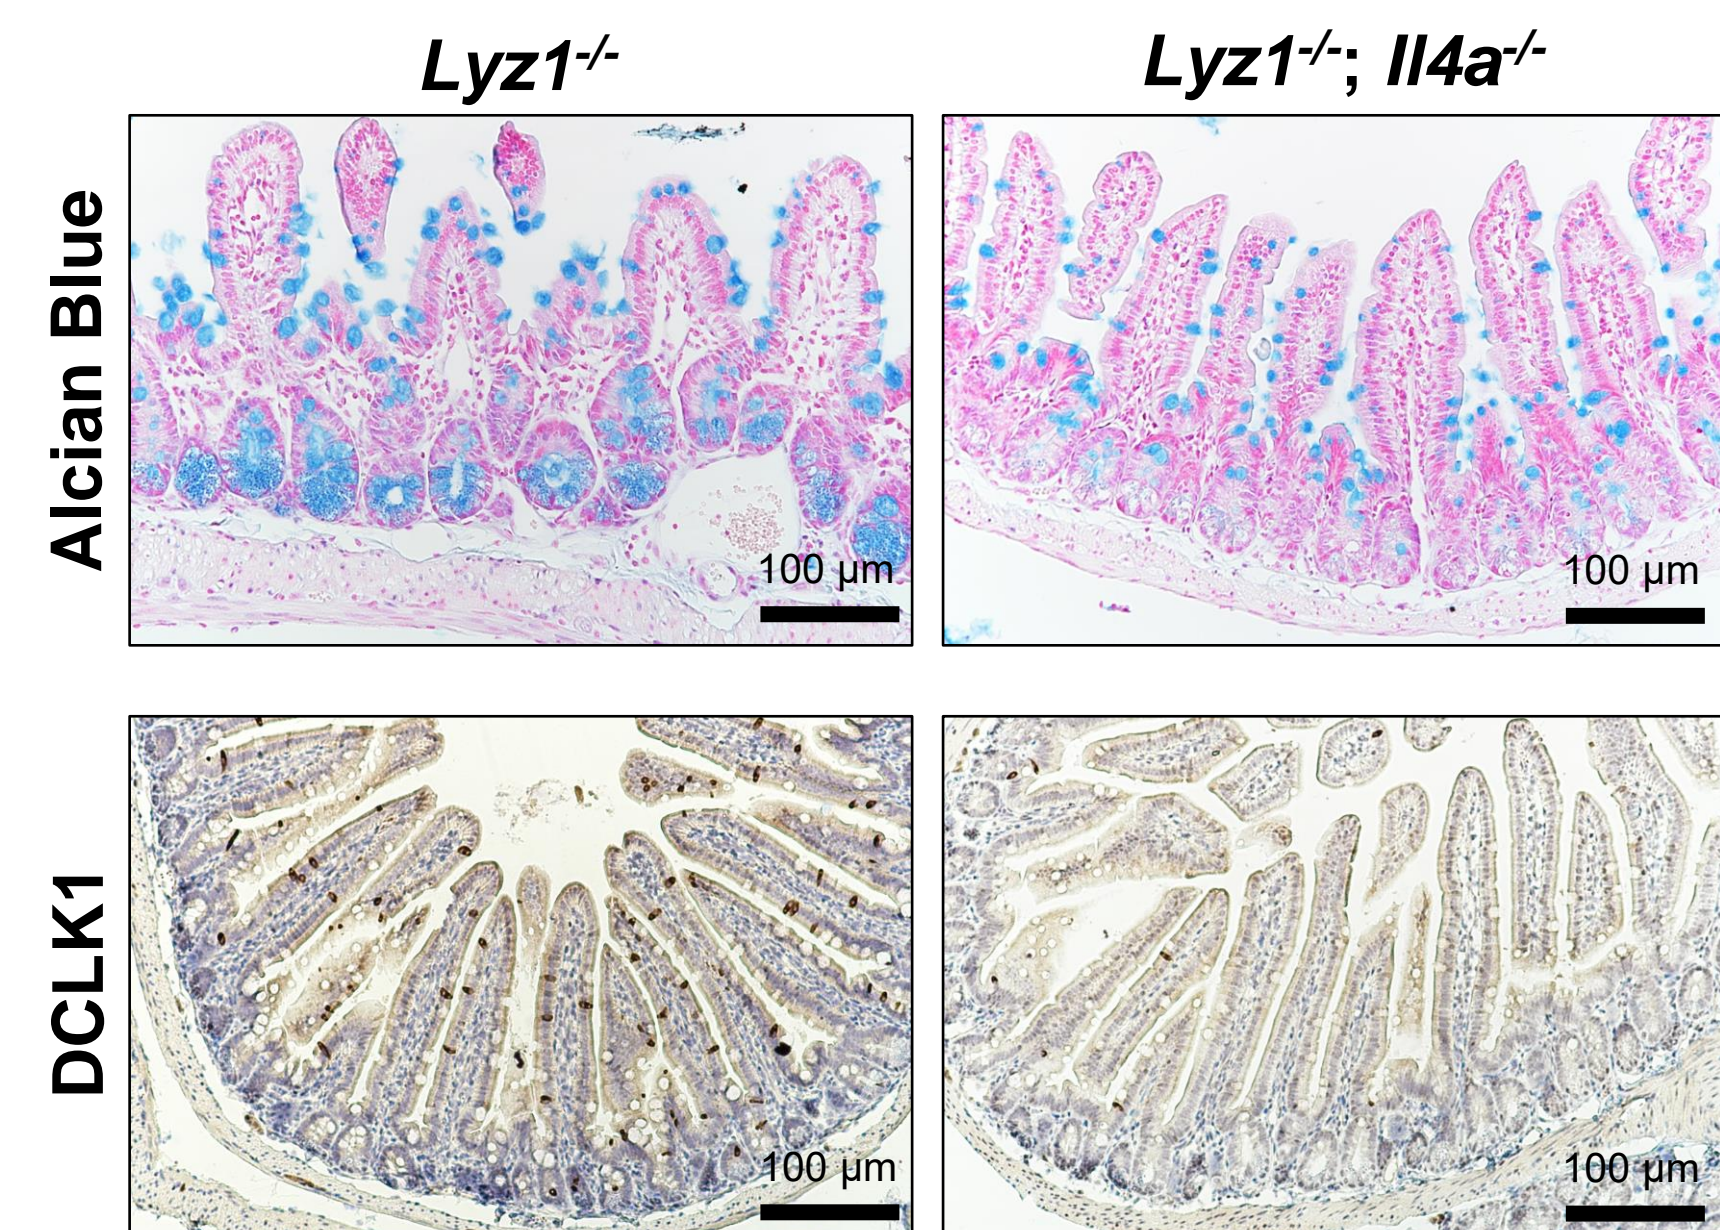

K

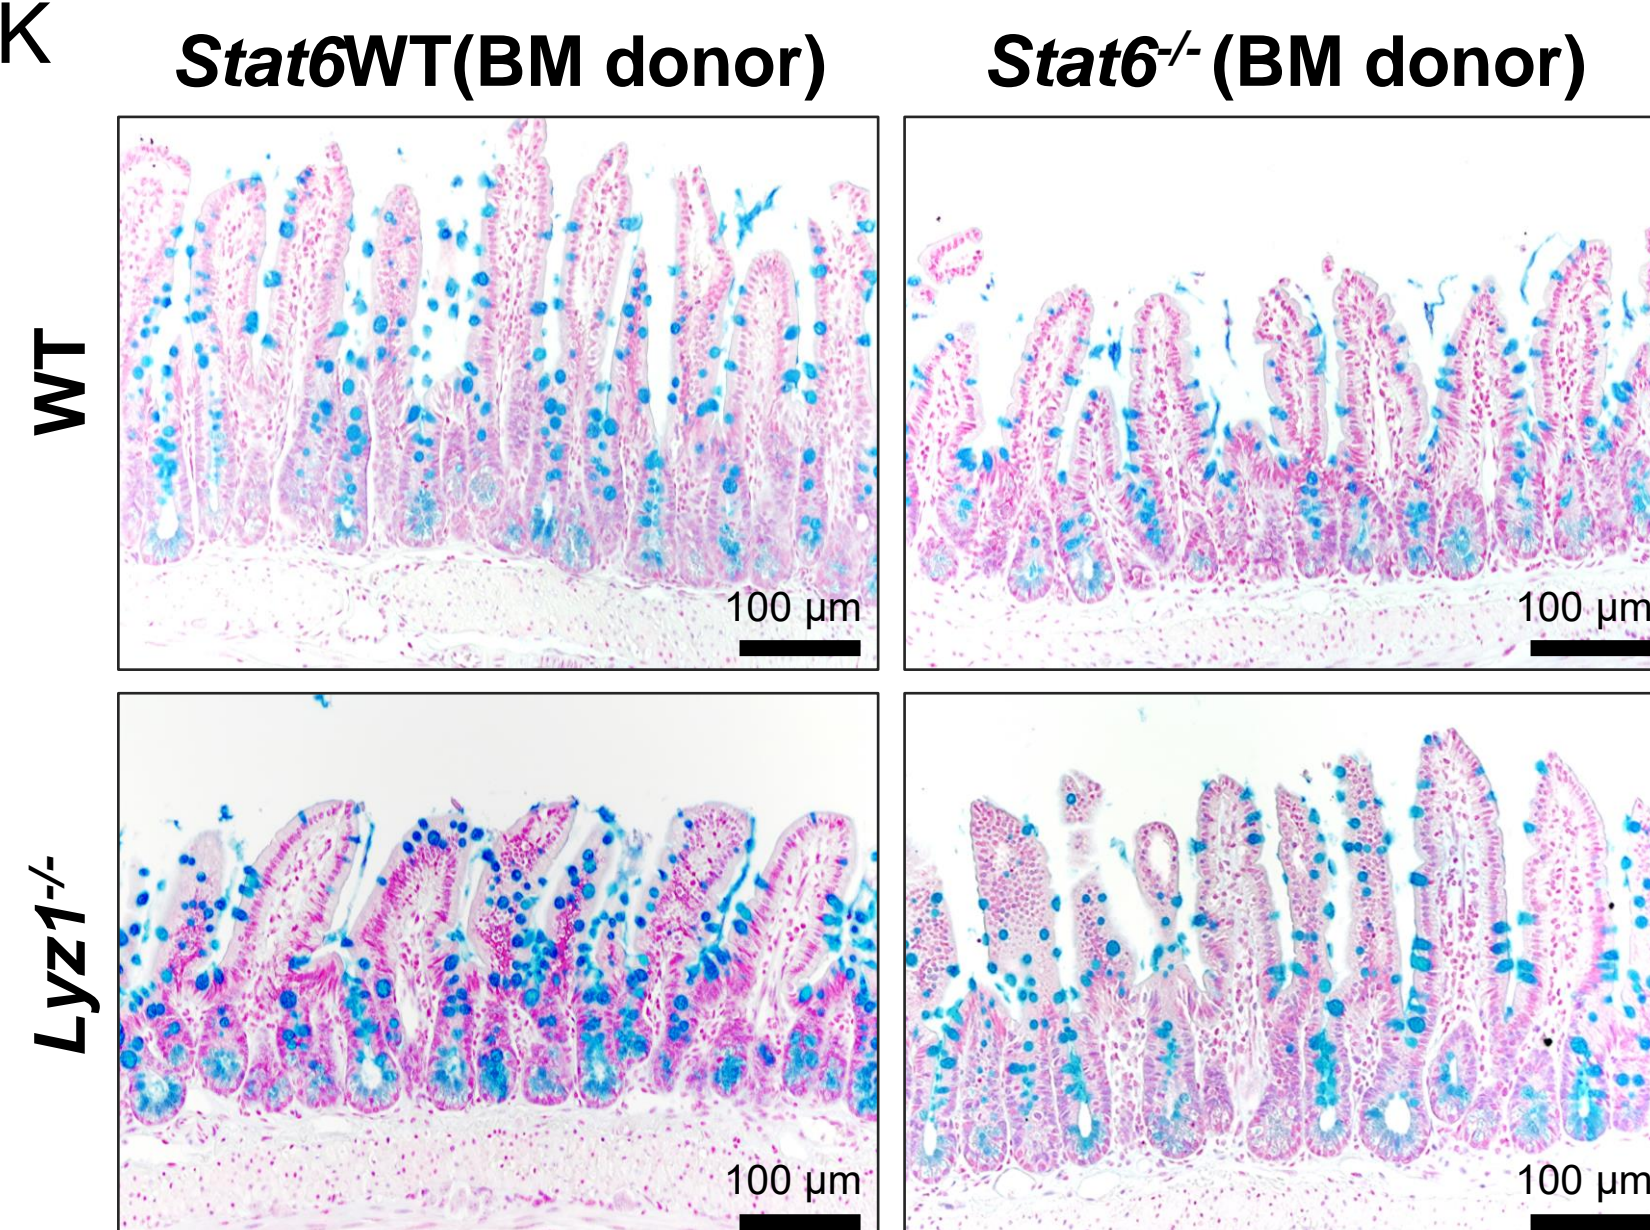



**Fig. S2. *Lyz1*<sup>-/-</sup> intestines have increased goblet and tuft cells, Related to Figure 2.**

**(A)** GSEA analysis of RNA-seq data (N=4 mice per genotype) comparing enterocyte gene signature in WT and *Lyz1*<sup>-/-</sup> ileum. **(B)** Immunostaining of Alcian blue and Dclk1 in WT and *Lyz1*<sup>-/-</sup> intestines (N=5 mice per genotype; 3 independent experiments). **(C, D)** Transmission electron microscopy of a cell with granules characteristic of mixed Paneth and goblet cell morphologies at the crypt base in the *Lyz1*<sup>-/-</sup> ileum **(C)** when compared to the Paneth cell observed at the crypt base of WT ileum **(D)** (N=3 mice per genotype). **(E-H)** Real-time PCR analysis of genes associated with type 2 **(E)**, type 1 **(F)**, type 3 **(G)**, or regulatory **(H)** immune response in WT and *Lyz1*<sup>-/-</sup> mice (N=3-6 mice per genotype). **(I)** Tuft cell numbers (counted from 50 villi per field of vision per mouse) in WT or *Lyz1*<sup>-/-</sup> mice treated with neutralizing anti-IL-13 antibody, anti-CD90.2, or isotype control (N=2 for each condition per genotype). **(J)** Representative Alcian blue (goblet) and DCLK1 (tuft) staining in *Lyz1*<sup>-/-</sup> and *Lyz1*<sup>-/-</sup> ;*Il4ra*<sup>-/-</sup> mice (N=3 mice per genotype). Data is representative of 50-80 villi per section per mouse per genotype. **(K)** Alcian blue staining of WT or *Lyz1*<sup>-/-</sup> bone marrow chimeras with hematopoietic cells from Stat6<sup>+/+</sup> or Stat6<sup>-/-</sup> donors (N=4 mice per genotype per treatment; 2 independent experiments). All bar graphs display mean ± SEM.



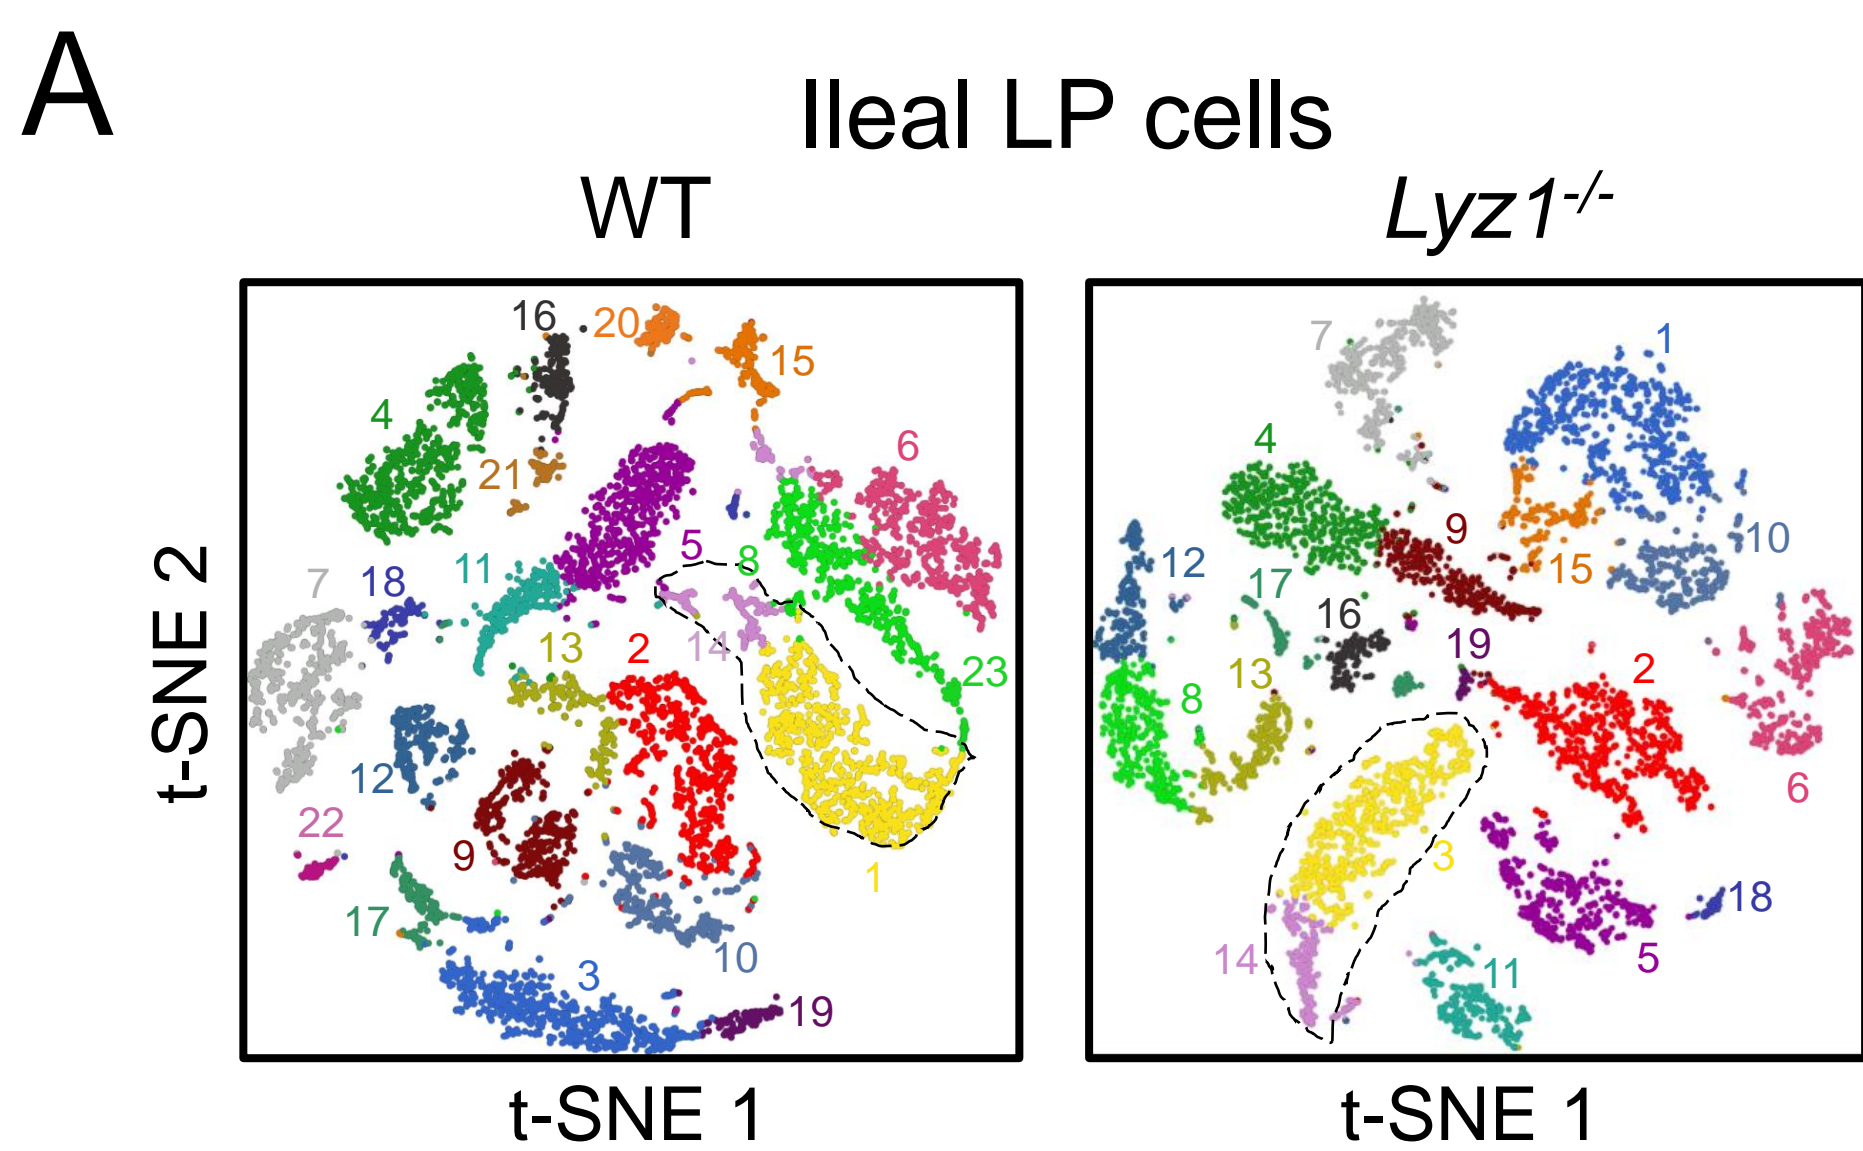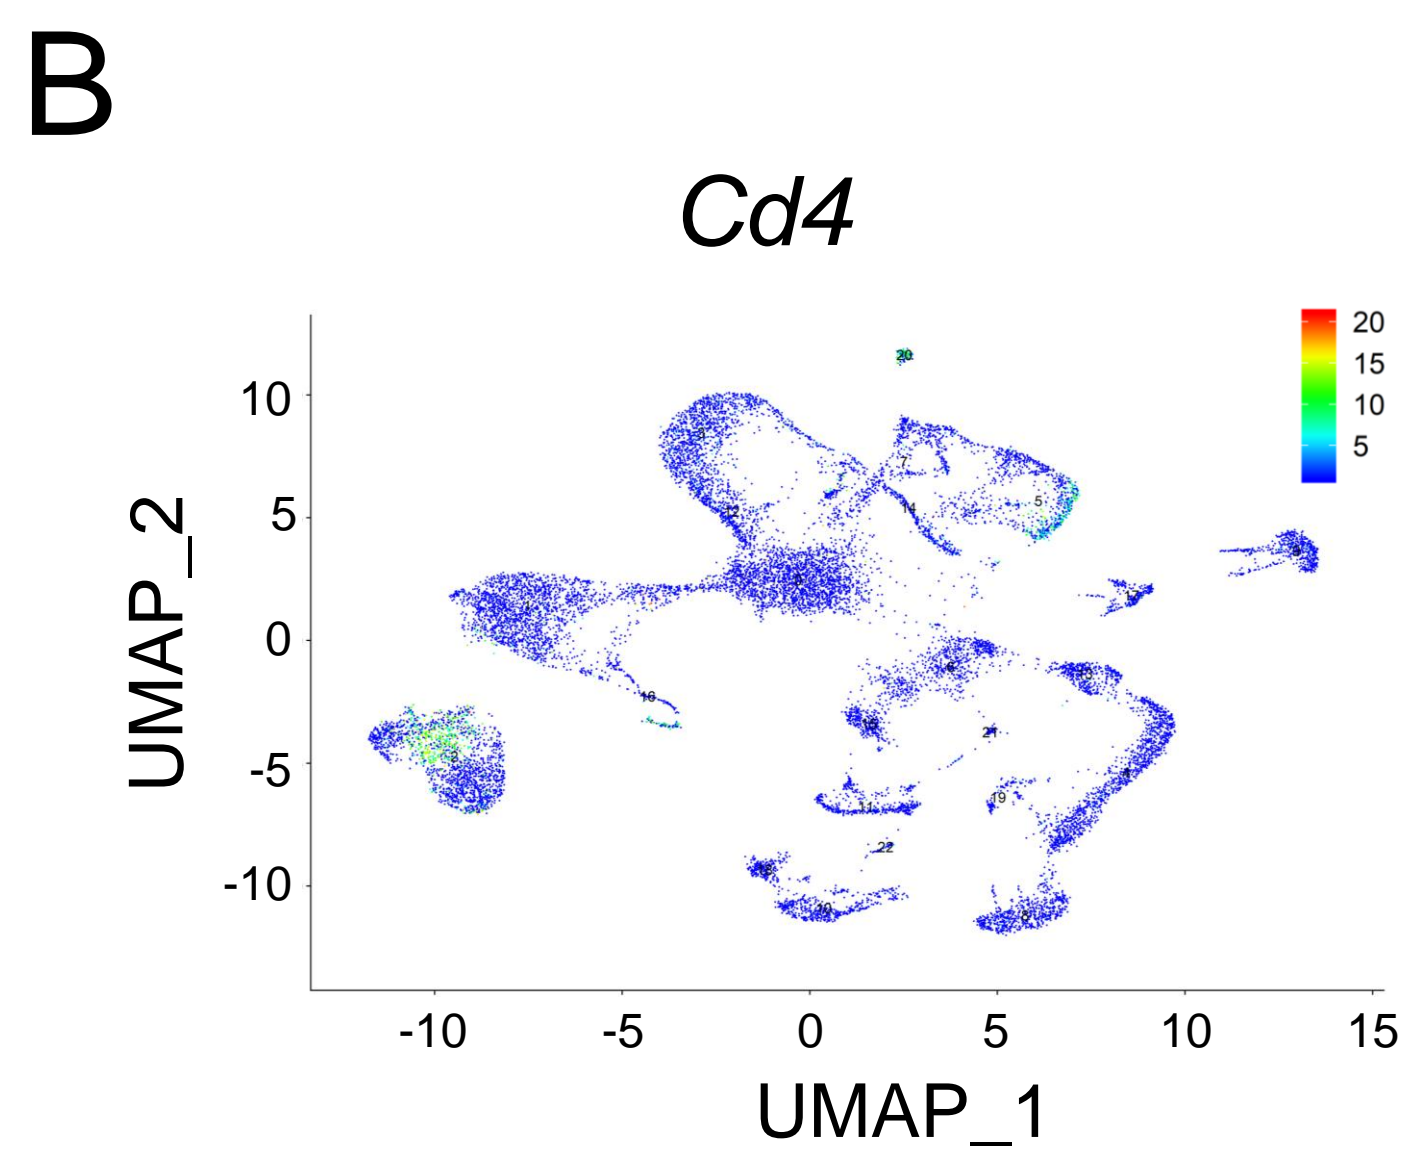

**C** DEG of WT vs. *Lyz1*<sup>-/-</sup>  
Cluster 16

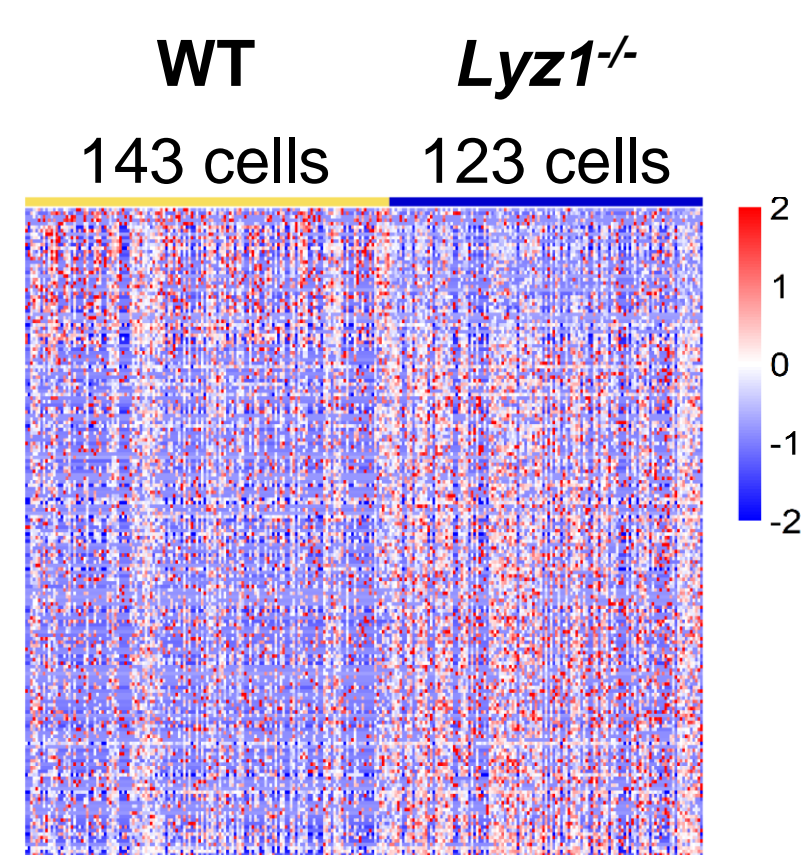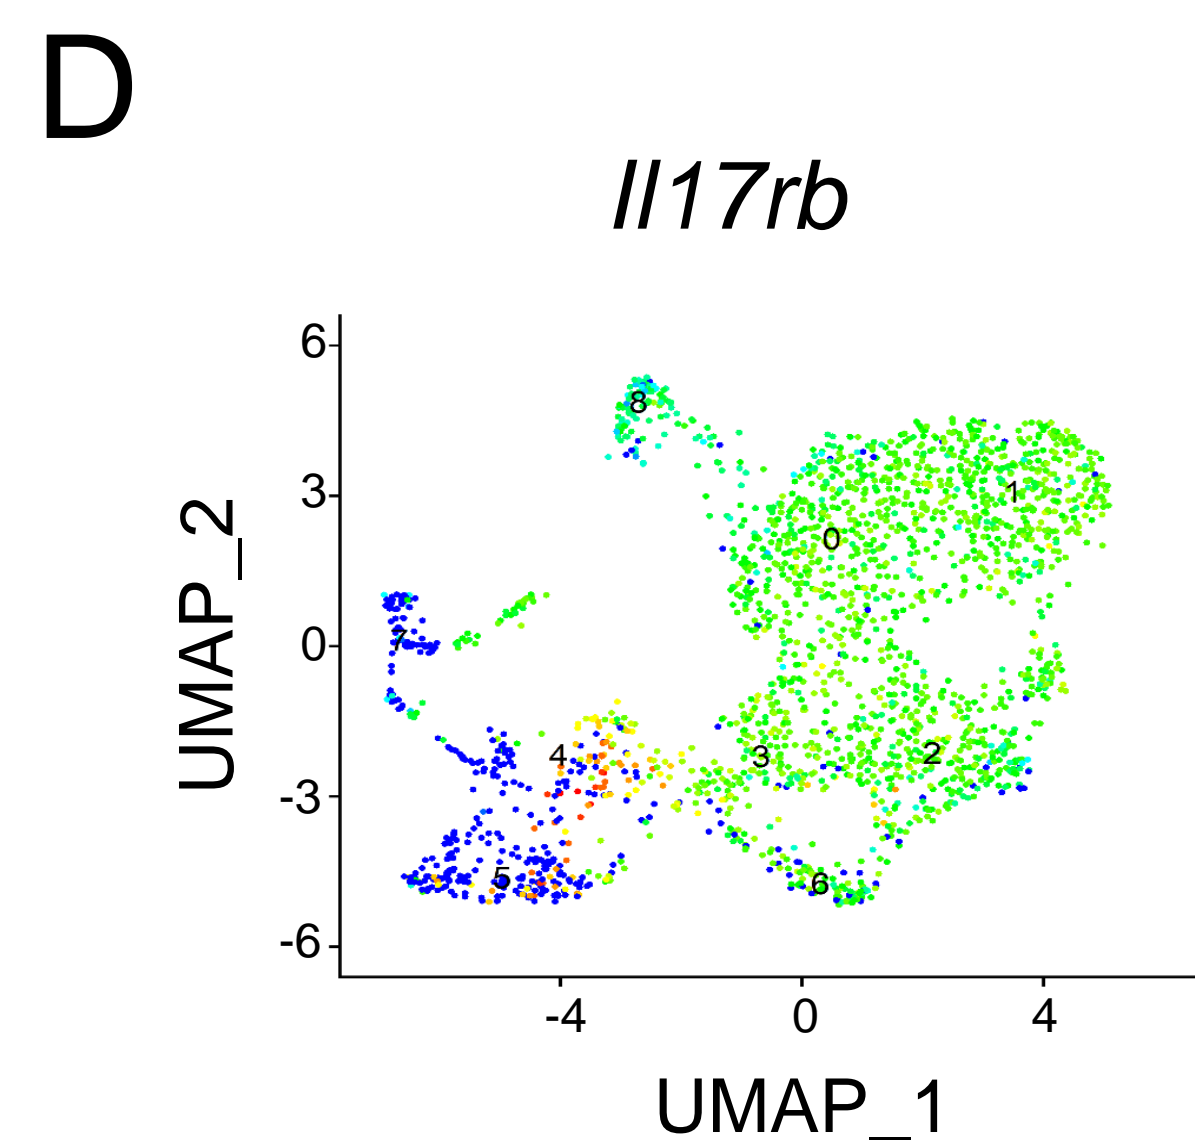

**E** Gene Ontology  
(Upregulated in *Lyz1*<sup>-/-</sup> Cluster 16)

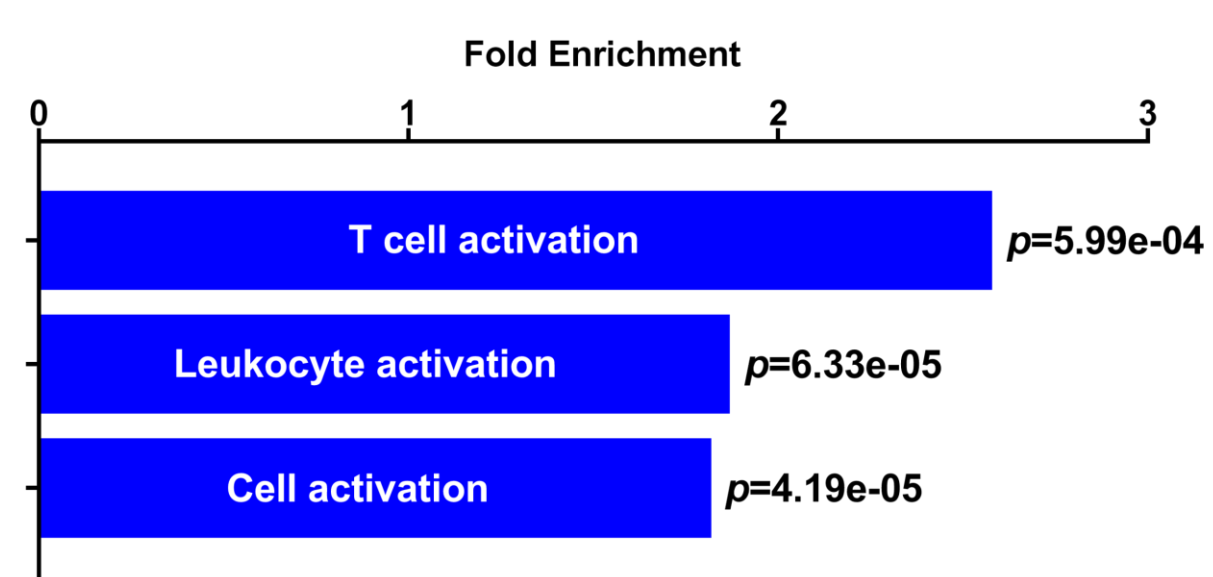

**F** Gene Ontology  
(Upregulated in WT Cluster 16)

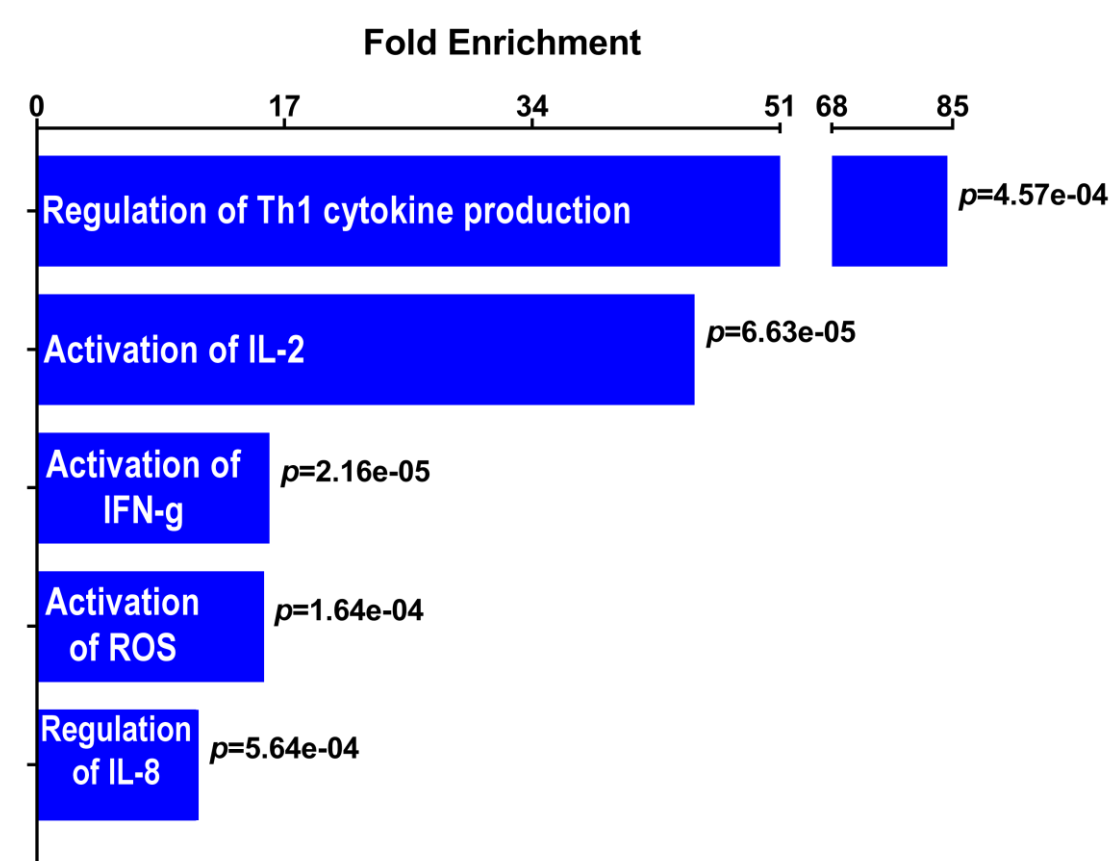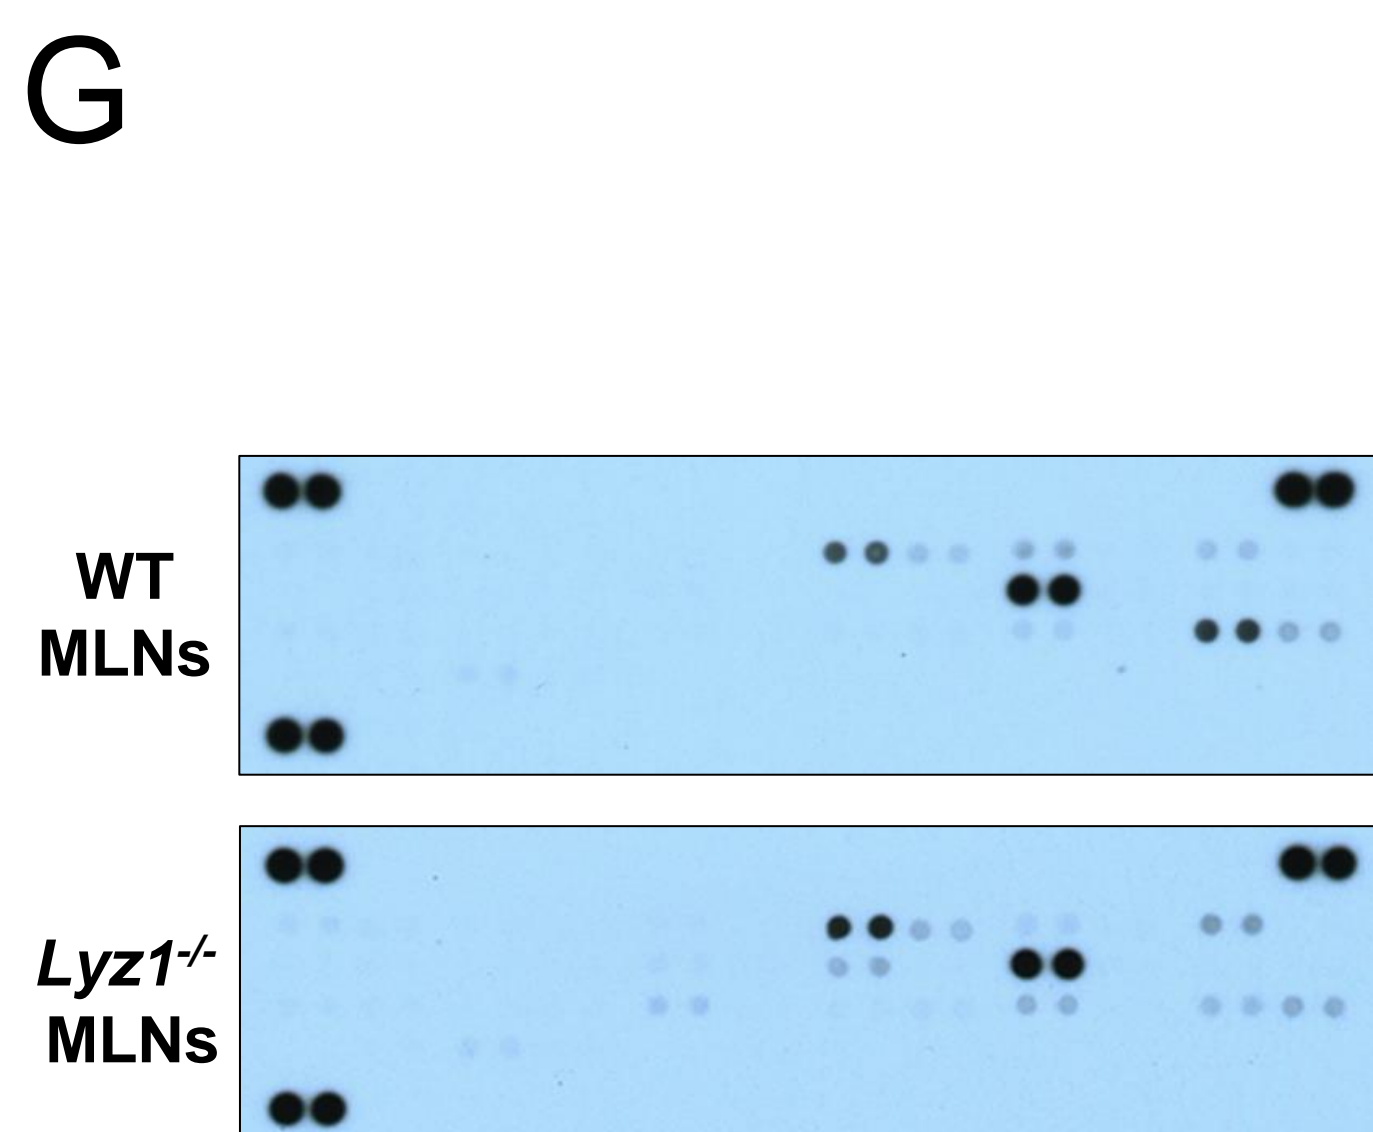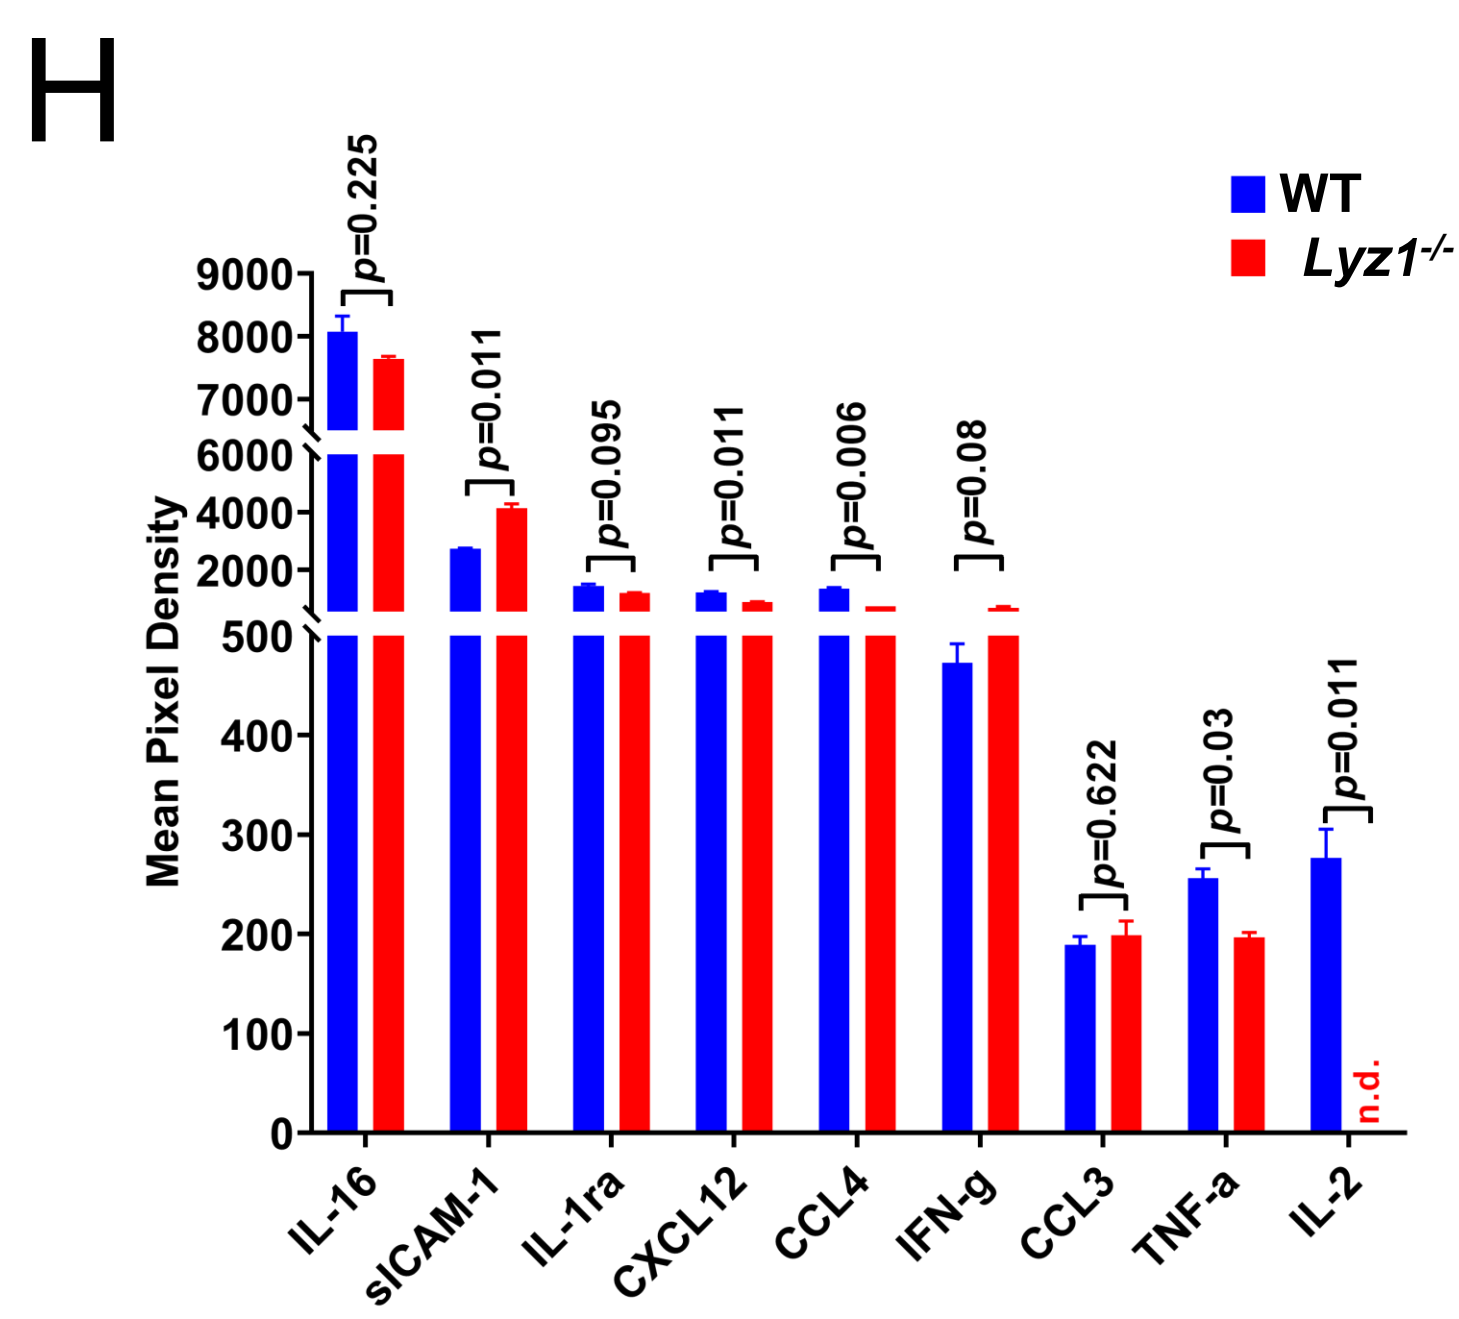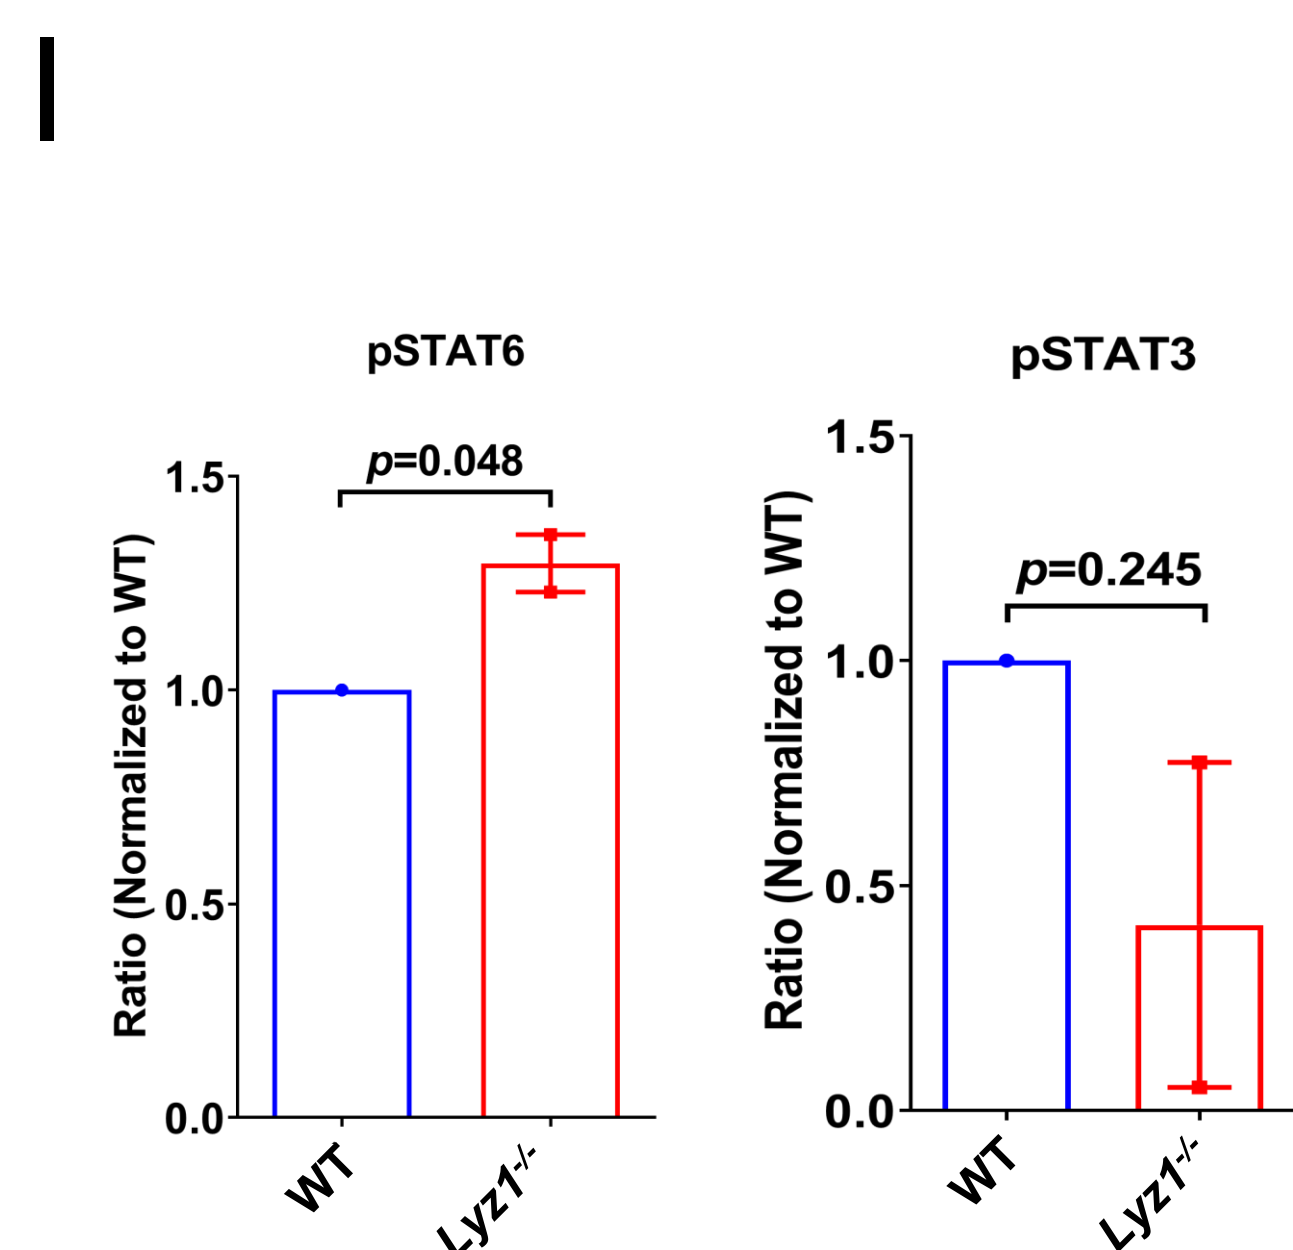



**Fig. S3. scRNAseq reveals immune-activated ILC2 in *Lyz1*<sup>-/-</sup> ileal lamina propria, Related to Figure 3**

**(A)** Unsupervised separate clustering (t-SNE plot) of 8,011 WT LP and 6,733 *Lyz1*<sup>-/-</sup> LP cells identified 23 and 19 distinct clusters, respectively. **(B-D)** Combined clustering of WT and *Lyz1*<sup>-/-</sup> ileal LP cells. **(B)** UMAP of 16,529 cells colored by relative expression of Cd4 confirmed ILC2 populations as clusters 1 and 16. **(C)** Heatmap shows differentially expressed genes between WT and *Lyz1*<sup>-/-</sup> ILC2 population in cluster 16. **(D)** WT and *Lyz1*<sup>-/-</sup> ILC2s were partitioned and clustered. UMAP colored by relative expression of *Il17rb* in the 9 sub-clusters. **(E)** Bar graphs exhibited the fold enrichment and p-value for Gene ontology (GO) pathways upregulated in *Lyz1*<sup>-/-</sup> cluster 16 compared to WT cluster 16. **(F)** Bar graphs exhibited the fold enrichment and p-value for Gene ontology pathways upregulated in WT cluster 16 compared to *Lyz1*<sup>-/-</sup> cluster 16. **(G)** Representative dot blots showed the cytokine expression profile of *in vitro* cultured WT and *Lyz1*<sup>-/-</sup> MLN cells at steady state. Intestinal MLN cells were isolated from separately housed WT and *Lyz1*<sup>-/-</sup> littermates (N=2 for each genotype). **(H)** Expression pattern of cytokines secreted by WT and *Lyz1*<sup>-/-</sup> MLN cells cultured *in vitro* quantified and represented as bar graphs. **(I)** Quantification of pStat6 and pStat3 levels in WT and *Lyz1*<sup>-/-</sup> MLN cell lysates based on western blot analysis. Intestinal MLN cells were isolated from separately housed WT and KO littermates (N=2 for each genotype). All bar graphs display mean  $\pm$  SEM.



A

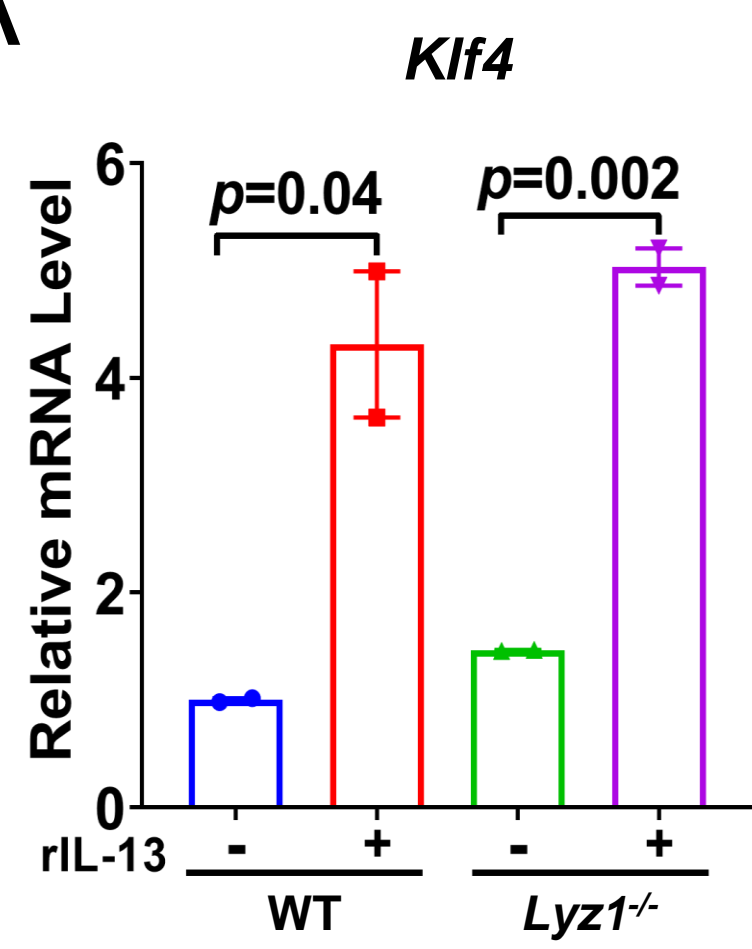

B

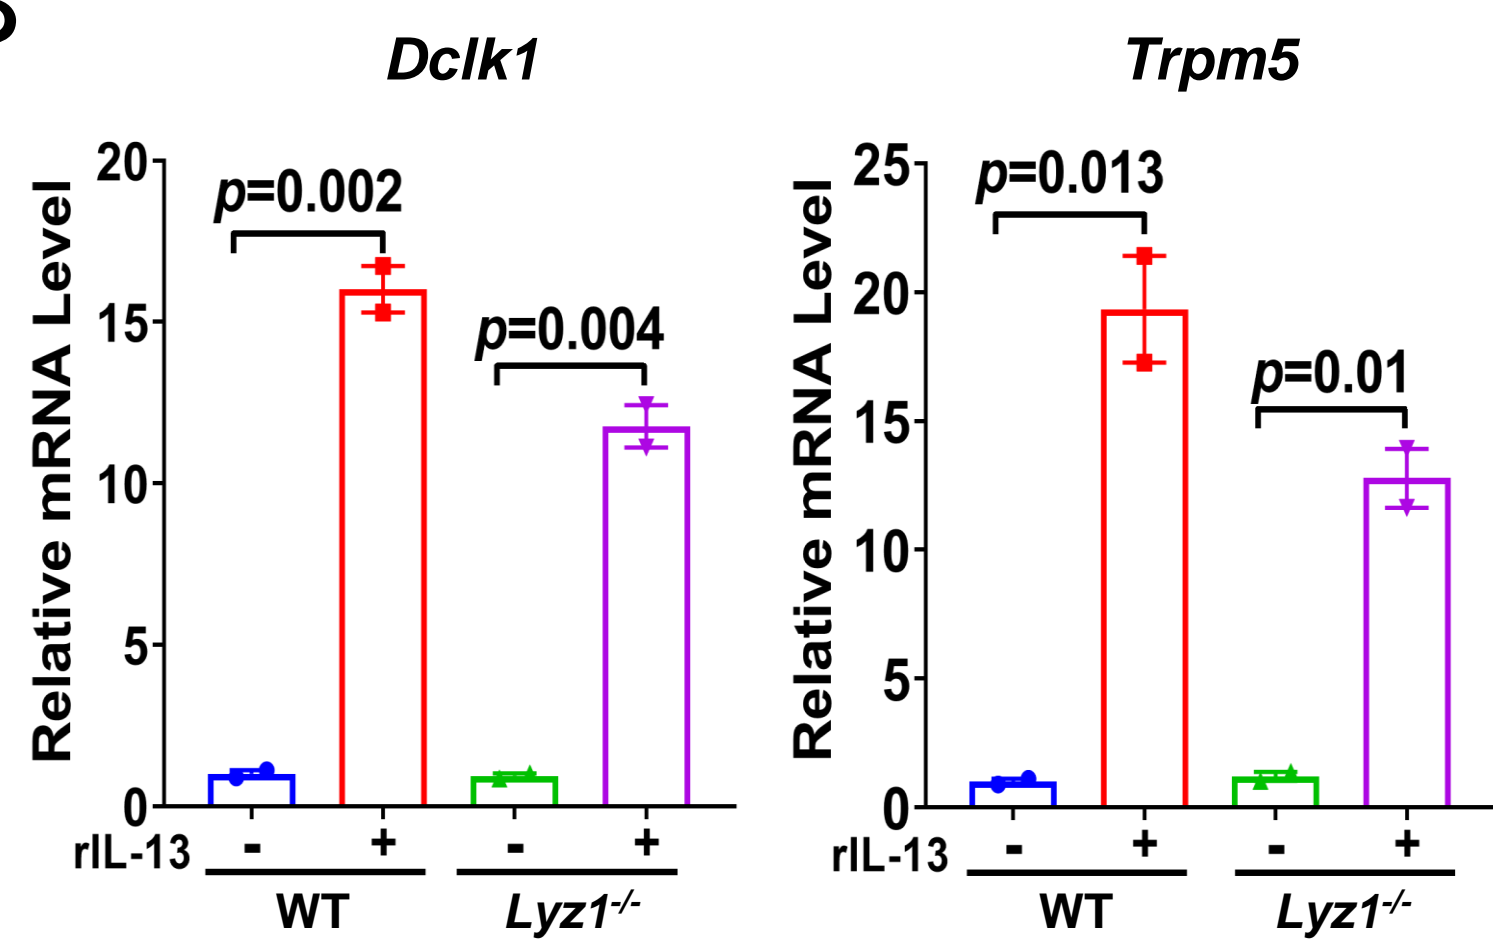*Trpm5*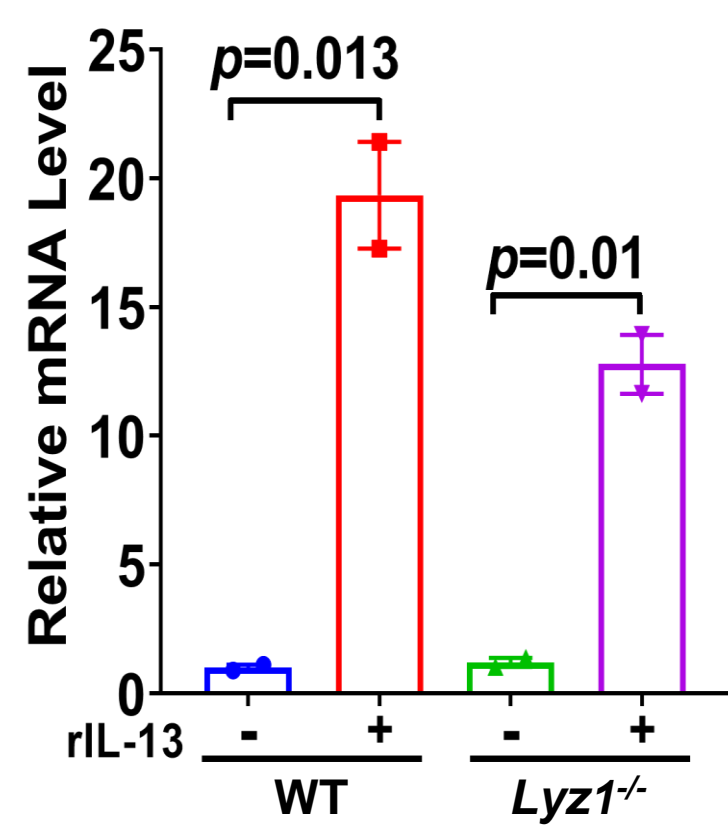

C

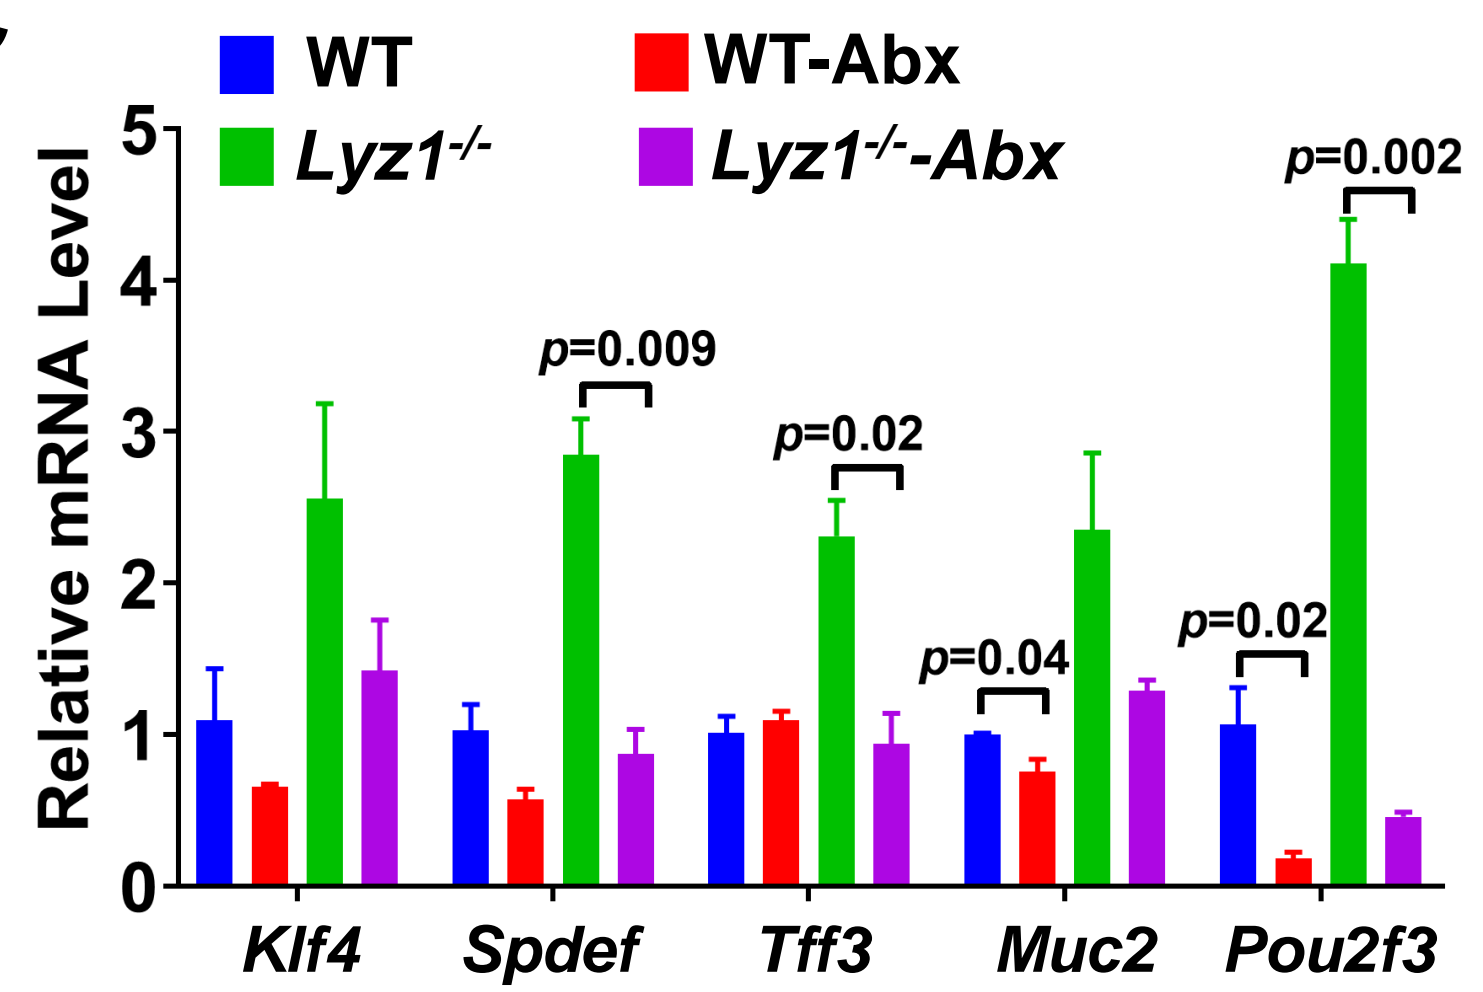



**Fig. S4. Type 2 immune response is non-epithelial intrinsic in *Lyz1*<sup>-/-</sup> mice, Related to Figure 4**

**(A)** qPCR analysis of mRNA expression of *Klf4* in ileal WT and *Lyz1*<sup>-/-</sup> enteroids treated with or without recombinant IL-13 (2 independent experiments). **(B)** Real-time PCR analysis of *Dclk1* and *Trmp5* in ileal WT and *Lyz1*<sup>-/-</sup> enteroids treated with or without recombinant IL-13 (2 independent experiments). **(C)** Real-time PCR analysis of goblet cell markers (*Klf4*, *Spdef*, *Tff3*, and *Muc2*) and tuft cell marker (*Pou2f3*) in untreated and Abs-treated WT and *Lyz1*<sup>-/-</sup> mice (N=4 mice for each condition). All bar graphs display mean  $\pm$  SEM.



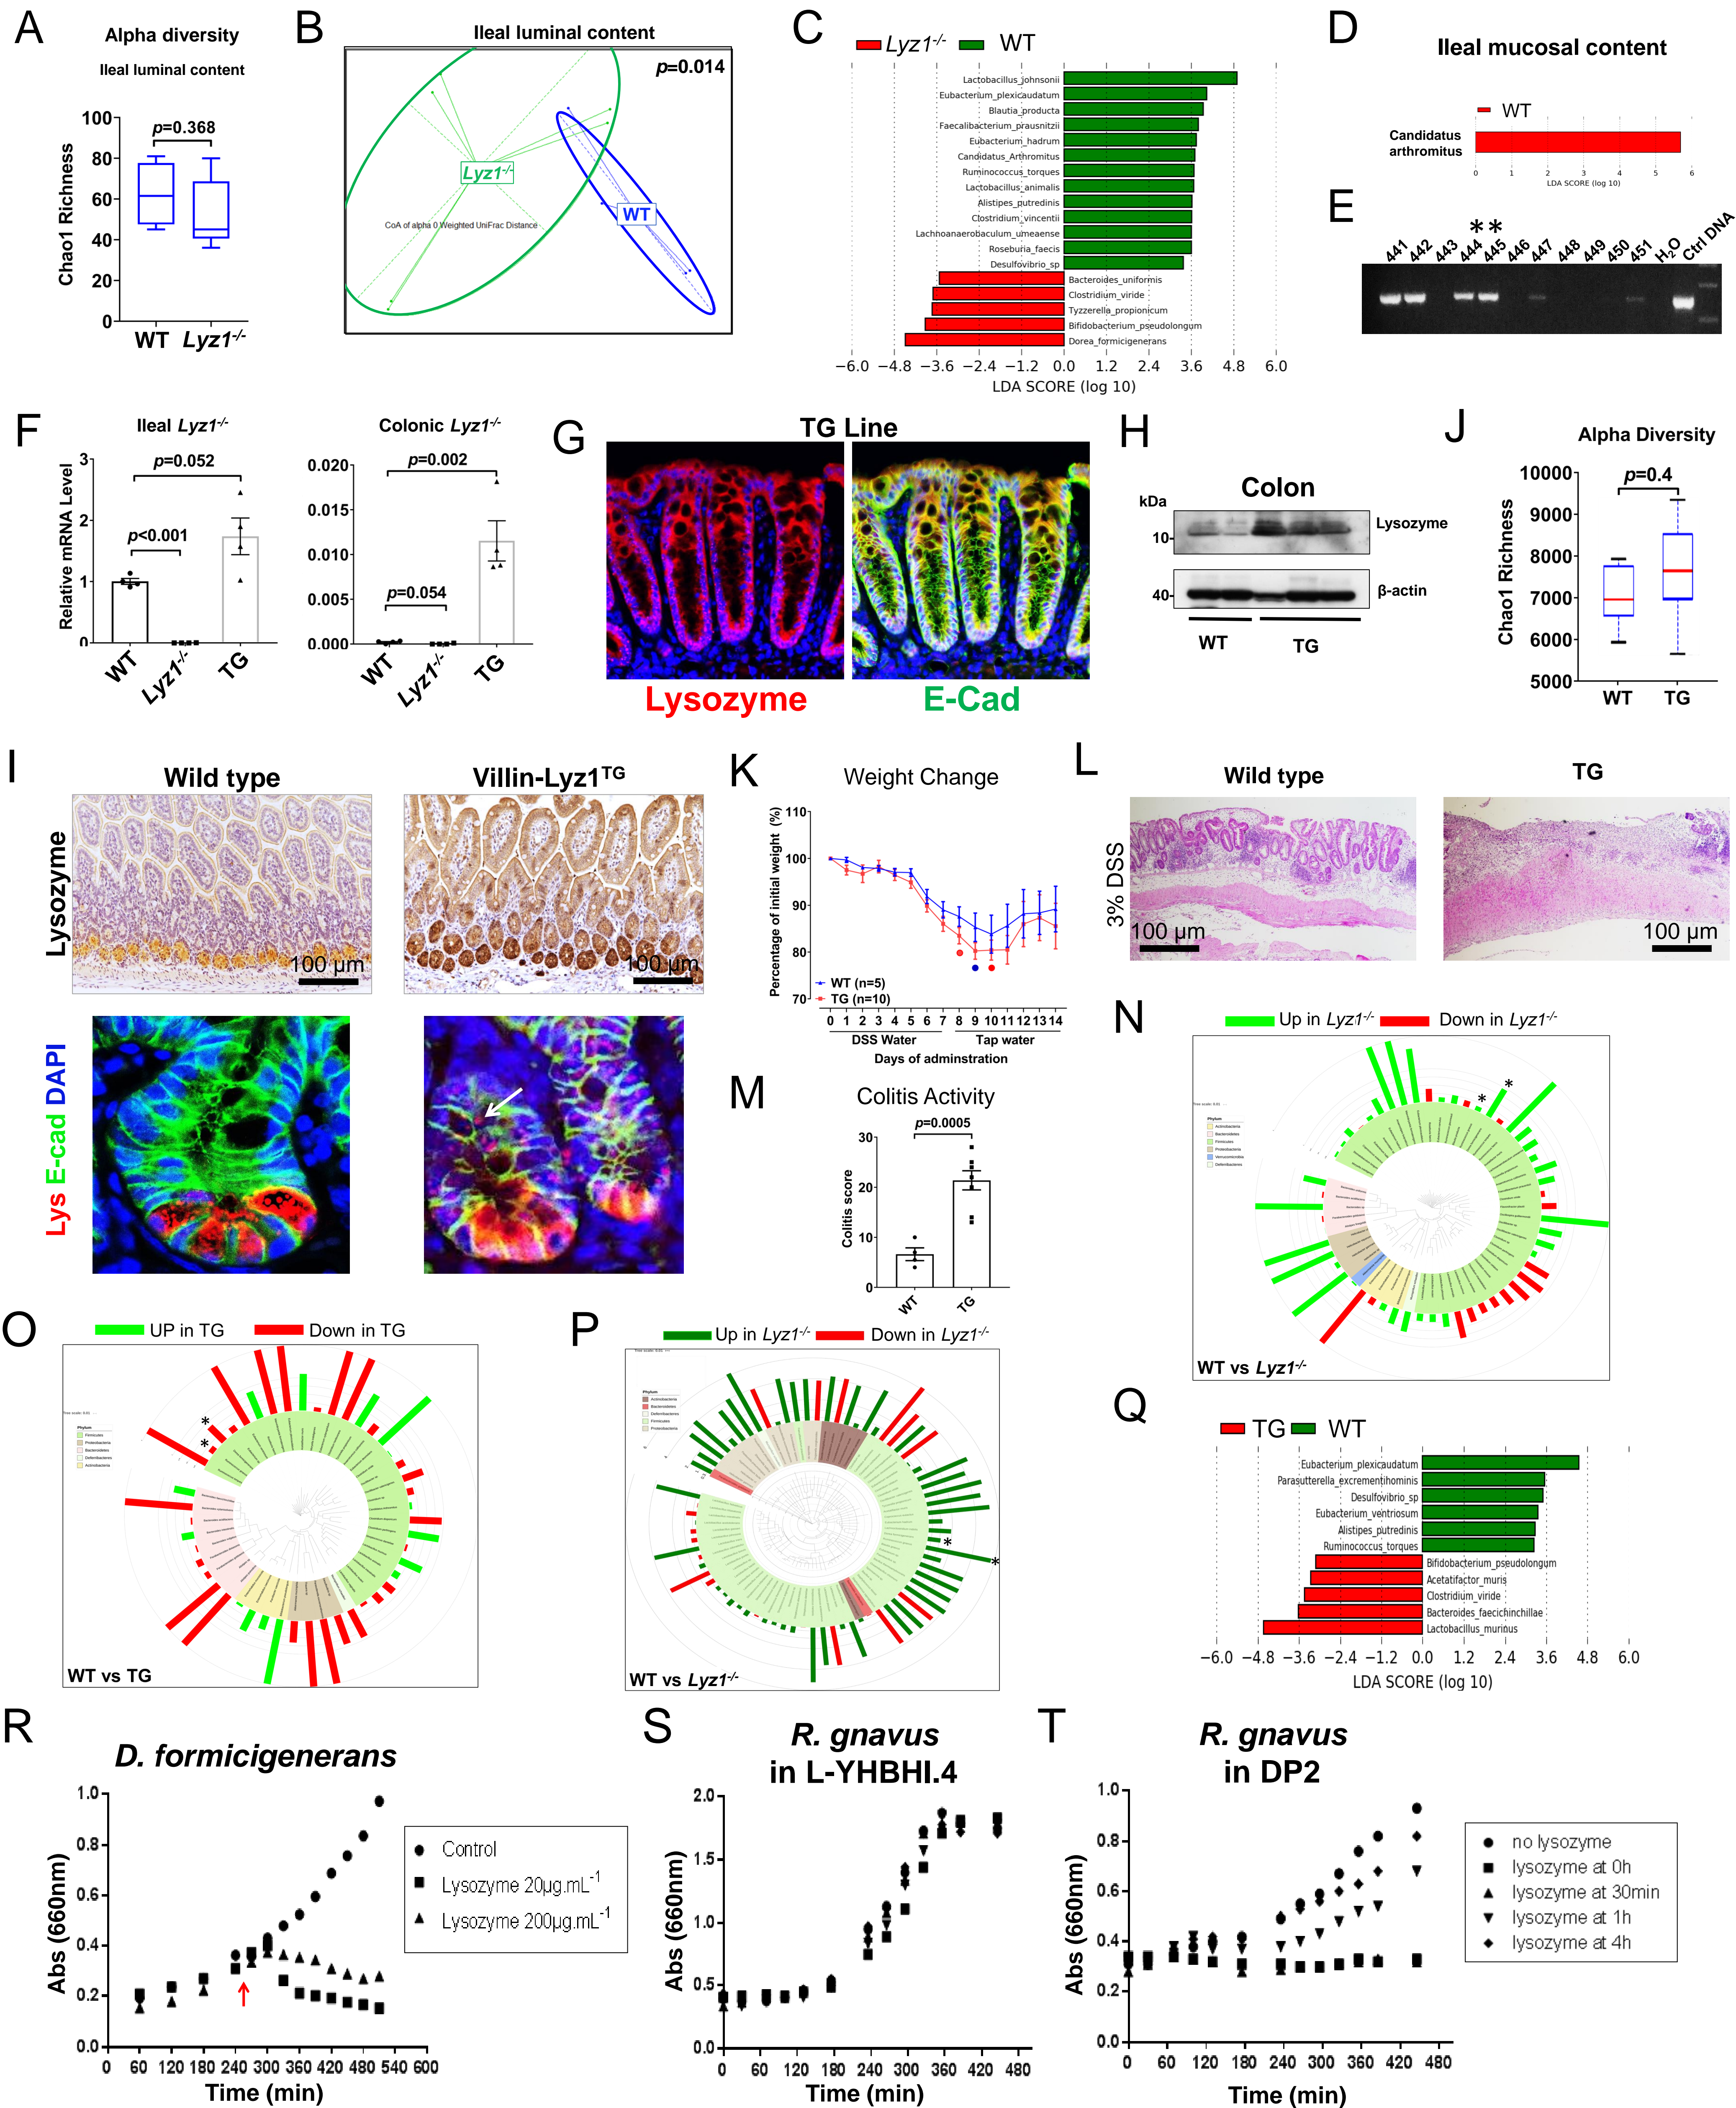



**Fig. S5. *Lyz1*-deficiency and –sufficiency alters composition of mucolytic composition, Related to Figure 5**

**(A)** Chao1 index (alpha diversity) of ileal luminal microbiota in WT (N=4 mice) and *Lyz1*<sup>-/-</sup> (N=6 mice). **(B)** Weighted UniFrac analysis of ileal luminal microbiota from WT (in blue, N=4 mice) and *Lyz1*<sup>-/-</sup> mice (in green, N=6 mice). **(C)** LDA of fecal bacteria enriched in WT mice (green bars; N=14 mice) and fecal bacteria enriched in *Lyz1*<sup>-/-</sup> mice (red bars; N=16 mice). **(D)** LDA scores computed by LEfSe found *Candidatus Arthromitus* differentially enriched in ileal mucosal microbiota of WT mice (N=8 mice) compared to *Lyz1*<sup>-/-</sup> mice (N=10 mice). **(E)** Genotyping PCR confirmed TG alleles. The TG animals marked (\*) were validated as founders. **(F)** qPCR analysis of lysozyme mRNA in WT, *Lyz1*<sup>-/-</sup>, and TG ileum and colon. (N=4 for each genotype). **(G-H)** Immunostaining (N>5) **(G)** and western blot analysis (N=2 for WT and N=3 for TG) **(H)** of lysozyme in the colon of TG mice. **(I)** Immunostaining of lysozyme in WT, *Lyz1*<sup>-/-</sup>, and TG ileum (N>5 for each genotype). White arrow indicated presence of lysozyme- positive vesicles. **(J)** 16S rRNA sequencing of WT (N=6 mice) and TG (N=5 mice) analyzed for Chao1 richness showed no significant difference in alpha-diversity. **(K)** Body weight change in WT (N=5 mice) and TG (N=10 mice) littermates when treated with 3% DSS and during recovery. Dot represents mouse that died on that day. **(L-M)** Representative H. & E. images of DSS colons **(L)** and colitis activities (M) were scored from remaining 4 WT mice and 8 TG mice. **(N-P)** Phylogenetic distribution and change in relative abundance of species between WT (N=4 mice) and *Lyz1*<sup>-/-</sup> (N=6 mice) fecal microbiota **(N)**, WT (N=6 mice) and TG fecal microbiota (N=5 mice) **(O)**, and WT (N=4 mice) and *Lyz1*<sup>-/-</sup> (N=6 mice) ileal luminal microbiota **(P)**. Bar size indicates the logarithm of relative abundance fold change. *Dorea formicigenerans* and *Ruminococcus gnavus* are marked (\*) in Fig S5N-P. **(Q)** LDA scores computed by LEfSe found 6 species differentially enriched in fecal microbiota of WT mice (N=6) and 5 species differentially enriched in *Lyz1*<sup>-/-</sup> mice (N=5). **(R)** Growth curve of *D. formicigenerans* decreased on addition of 20 µg/ml or 200 µg/ml of lysozyme during the exponential phase, when compared to the control condition. Red arrow indicated the time point of addition of lysozyme. **(S)** Growth curve of *R. gnavus* in L-YBHI.4 medium does not change on addition of lysozyme during exponential or lag phases (2-4 independent experiments). Red arrow indicated the time of addition of lysozyme. **(T)** Growth curve of *R. gnavus* in DP2 medium decreased more on addition of lysozyme 0 or 30 minutes after inoculation of culture compared to addition of lysozyme 1 or 4 hours after inoculation (2-4 independent experiments). All bar graphs display mean ± SEM.



**A** WT-FMT: DSS vs Sterile water

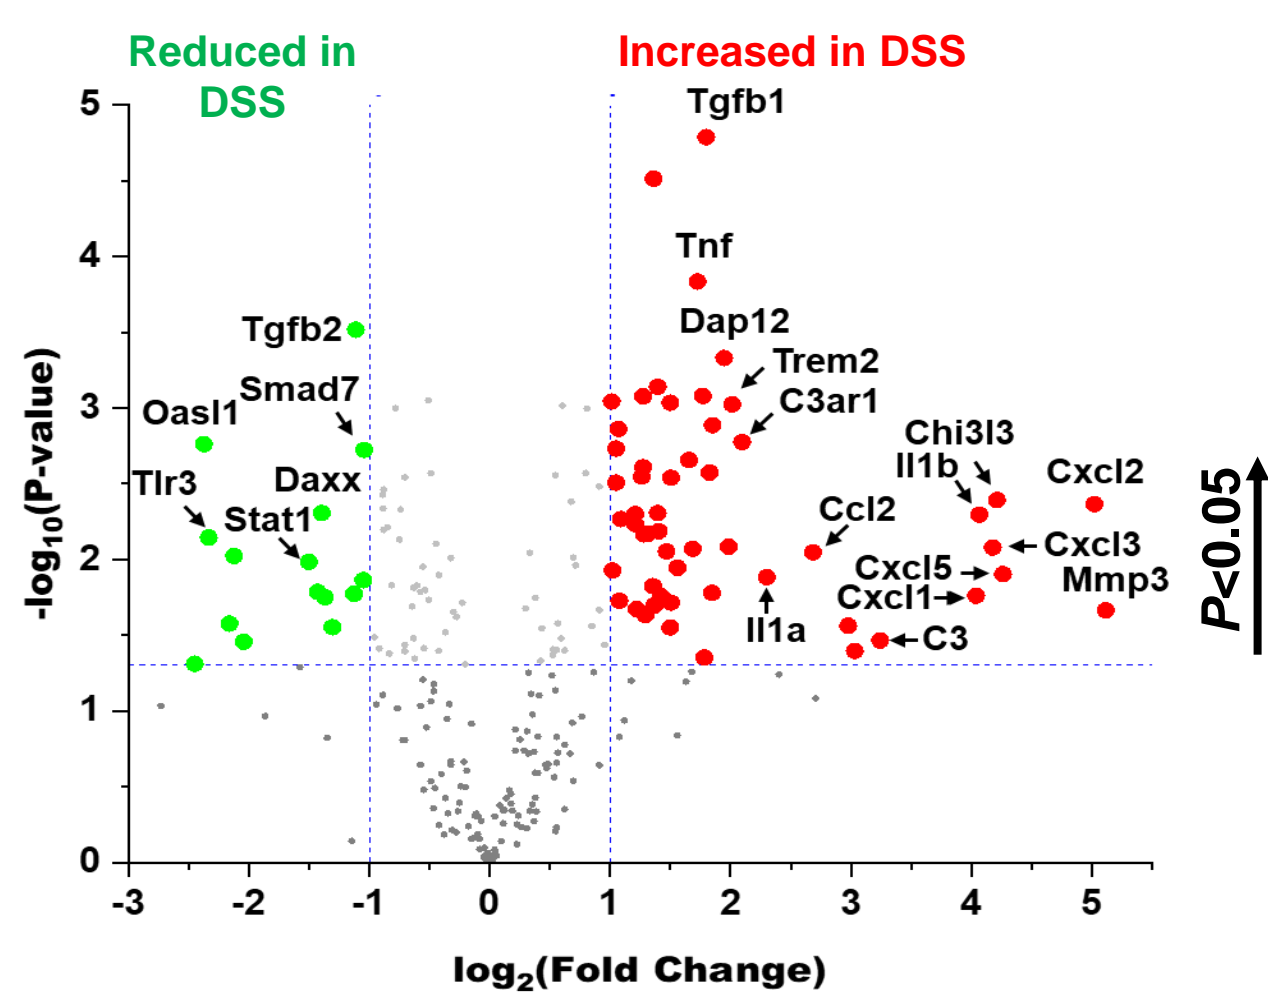

**B** *Lyz1*<sup>-/-</sup>-FMT: DSS vs Sterile water

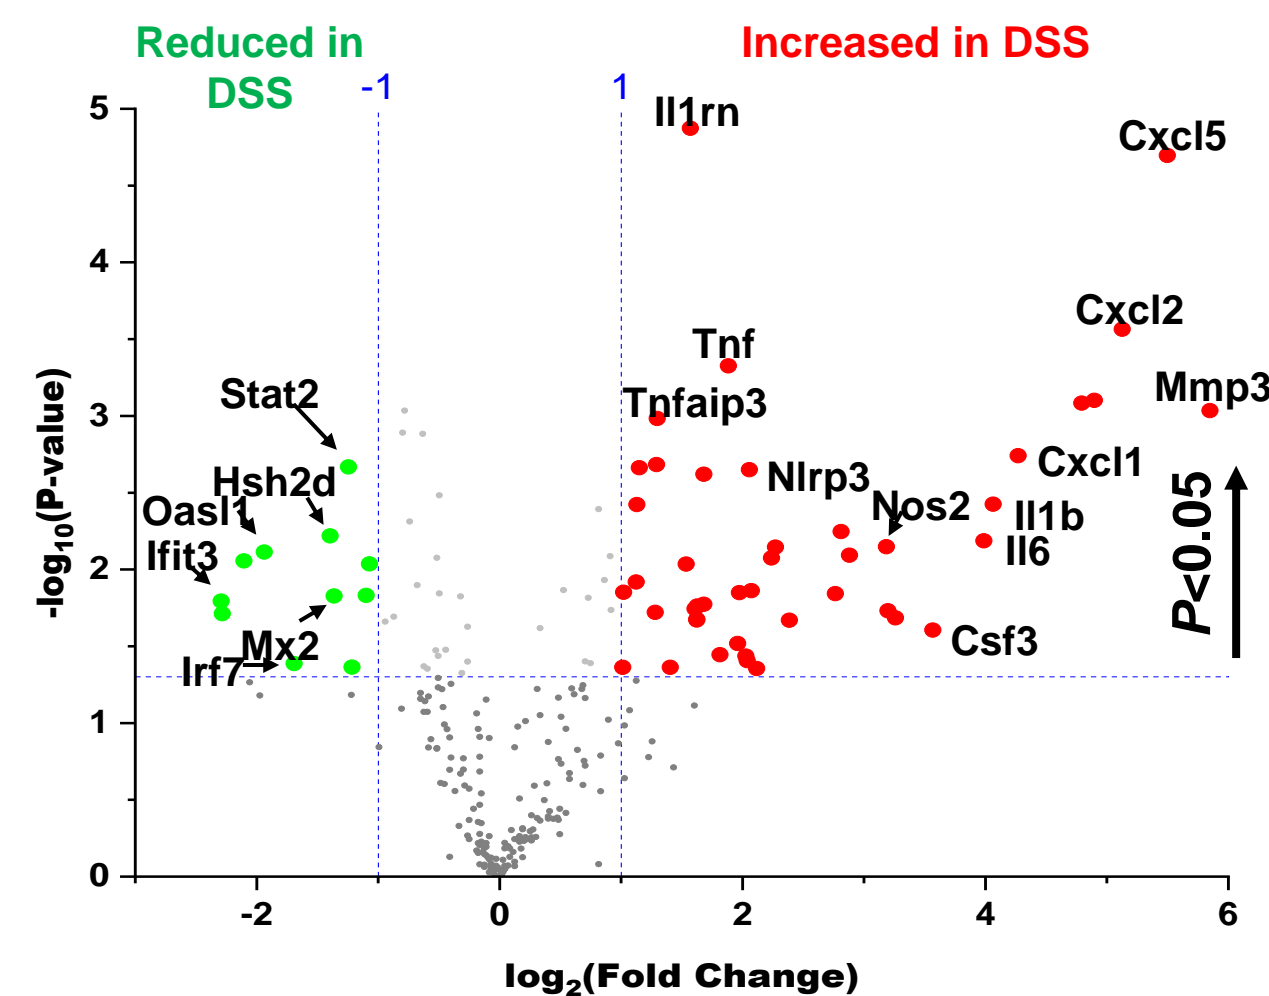

**C** TG-FMT: DSS vs Sterile water

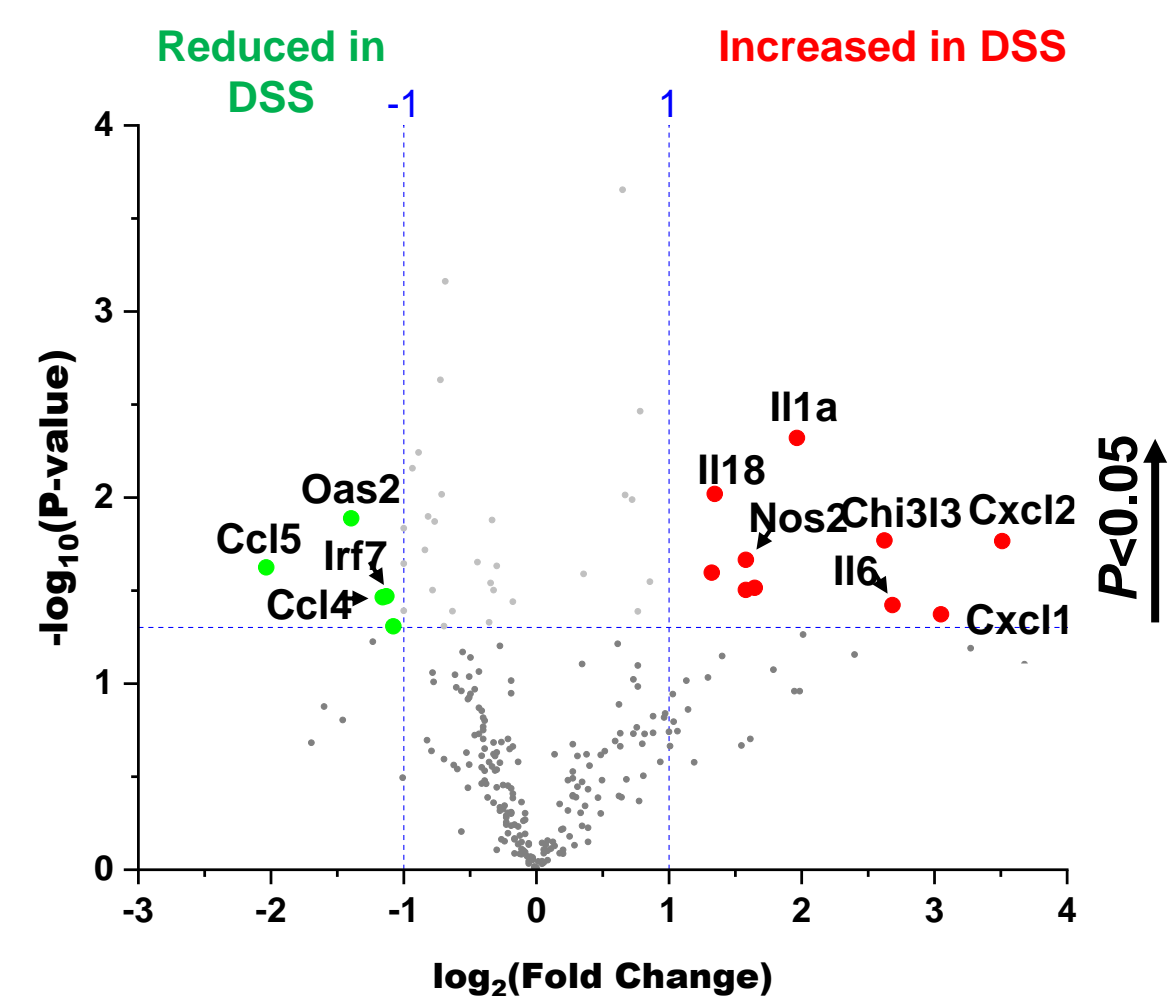

**D**

pStat3

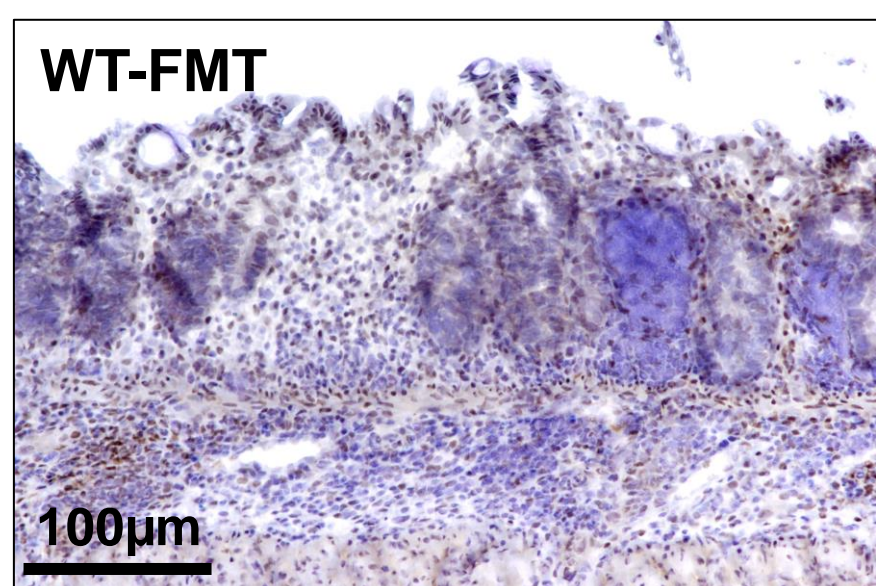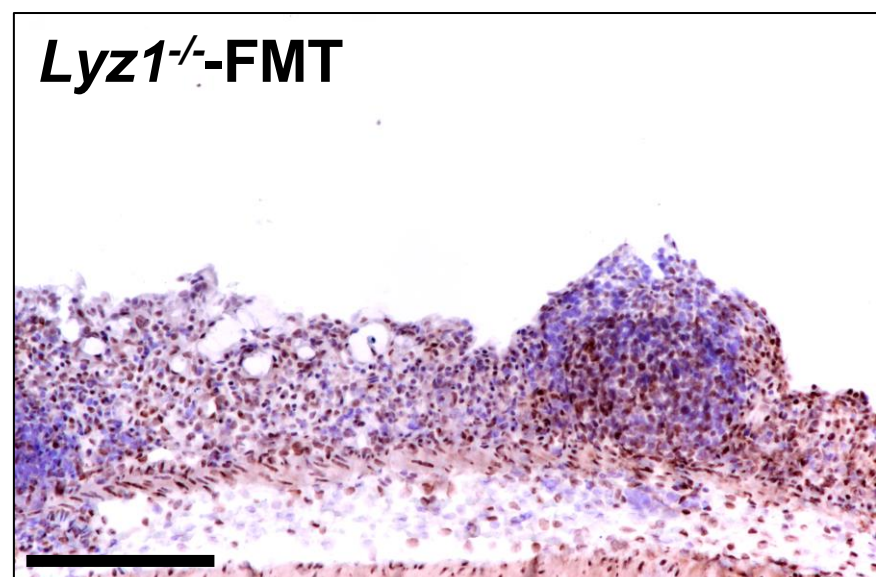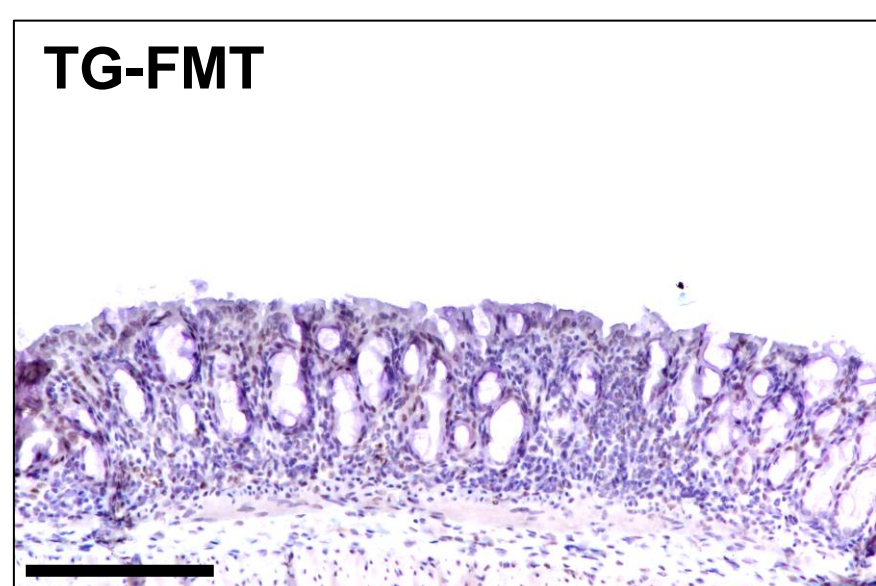

**E**

pStat6

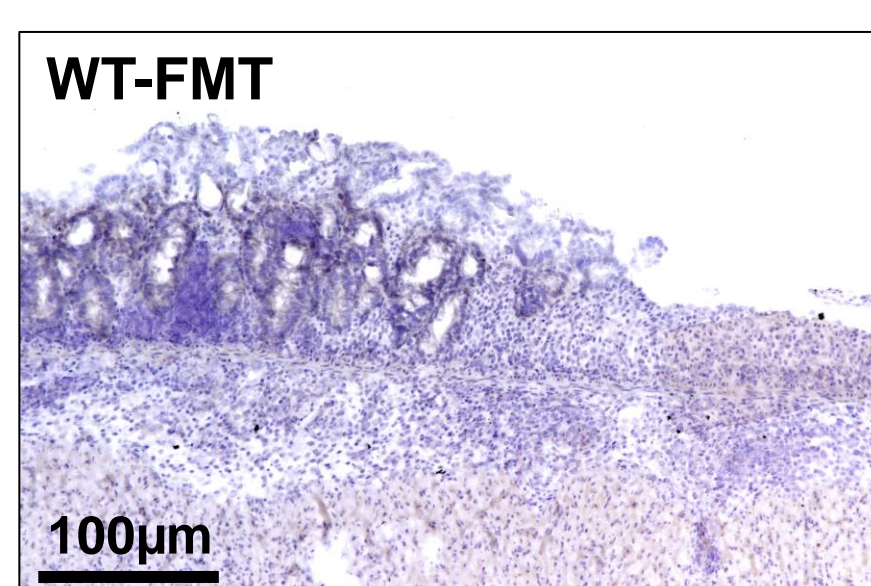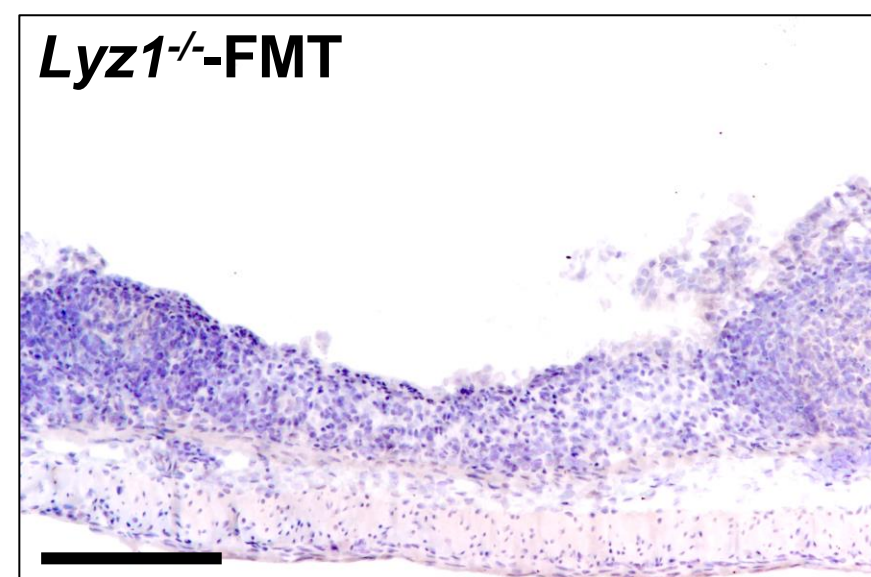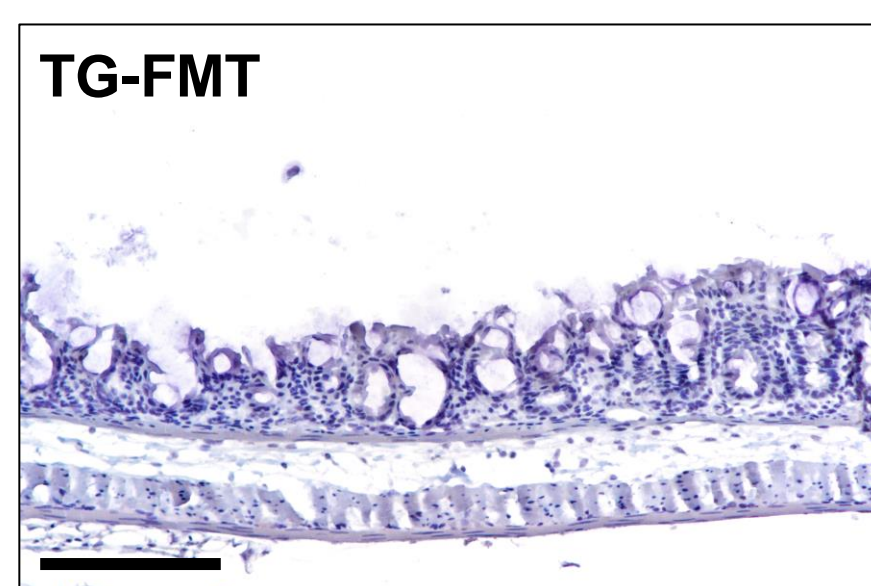

**F**

KEGG Pathway Analysis

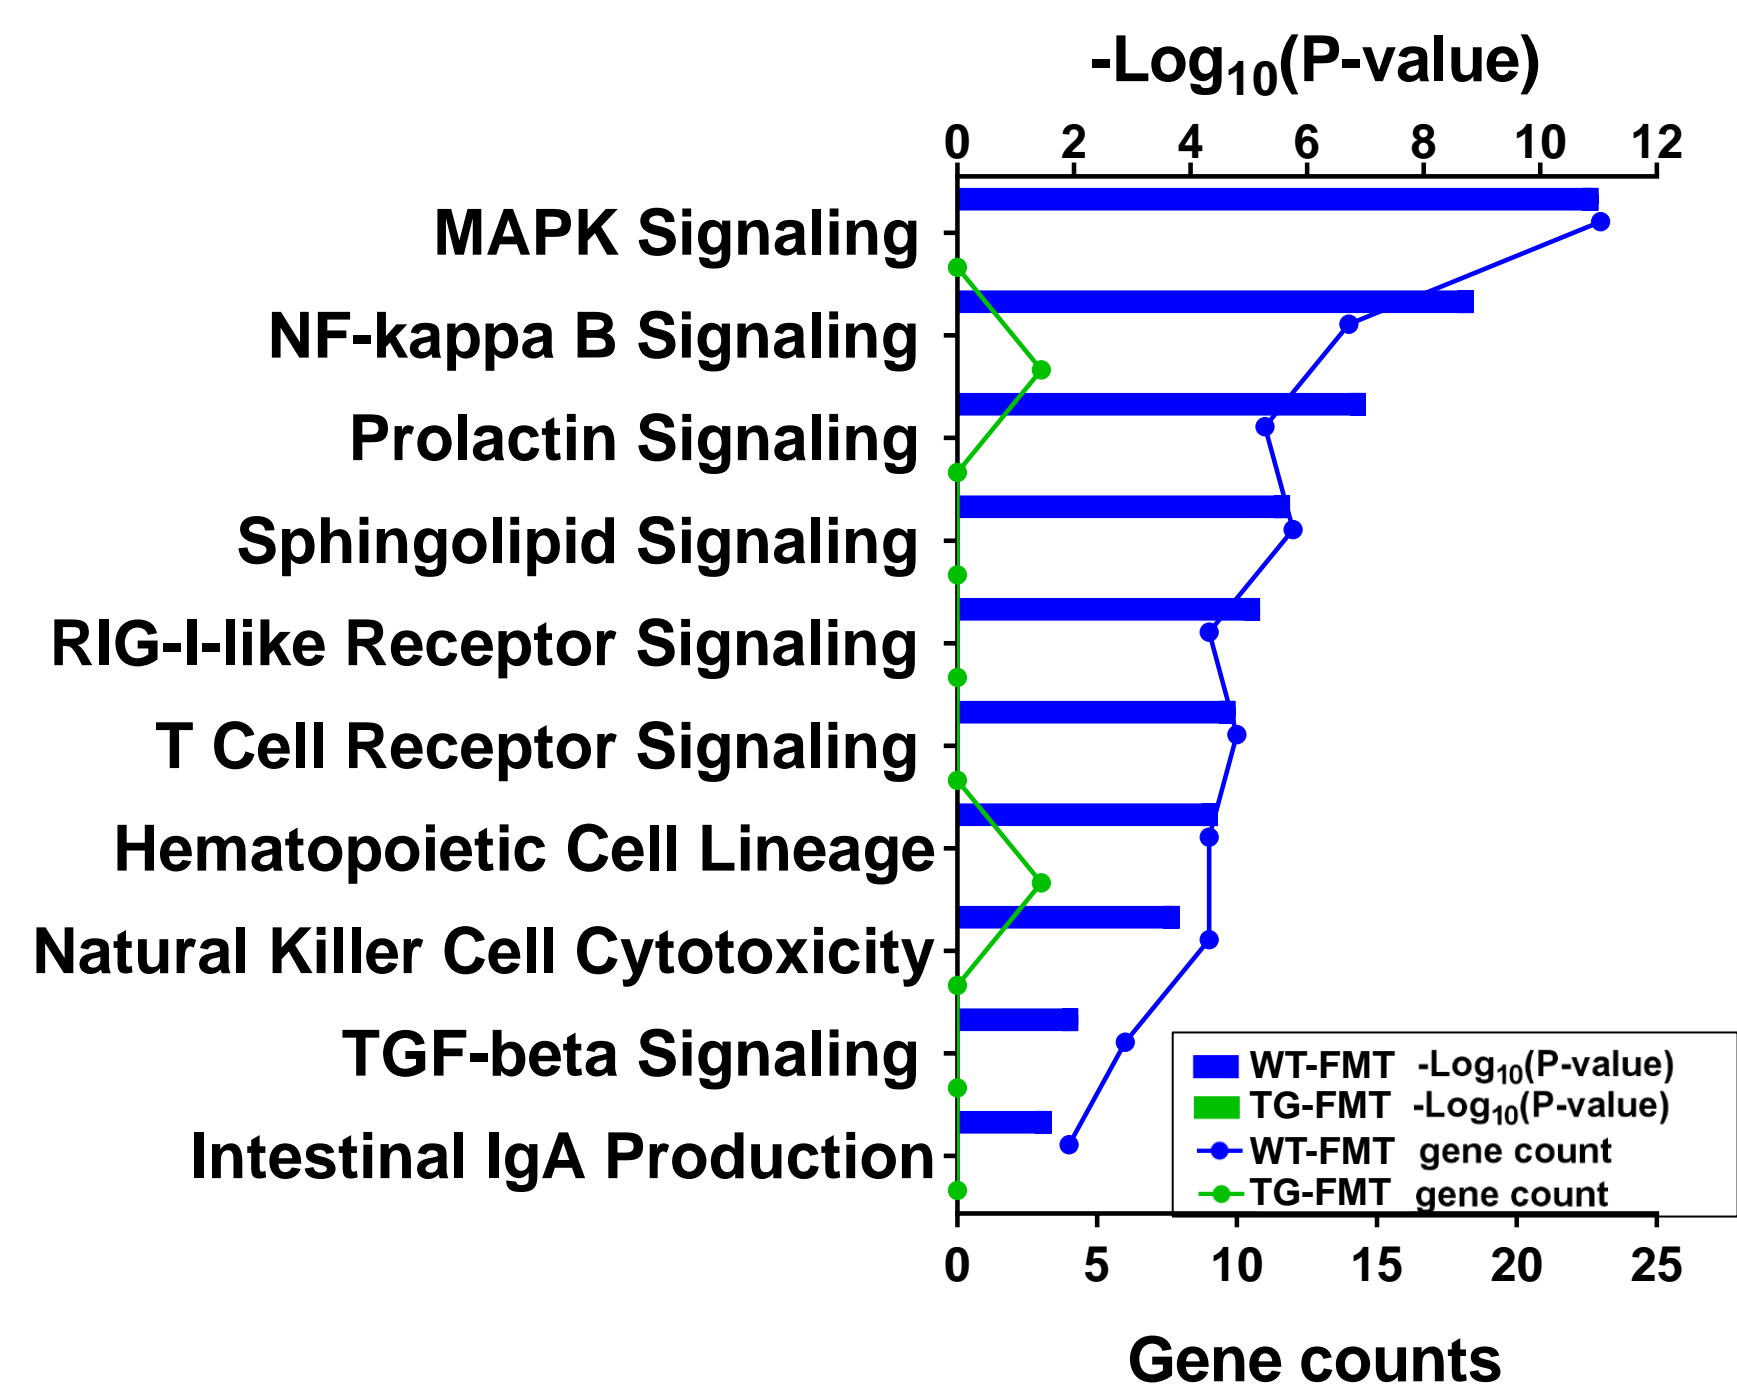



**Fig. S6. Transfer of *Lyz1*<sup>-/-</sup> microbiota to WT GF mice does not transfer protection, Related to Figure 6**

**(A-C)** Volcano plot of differential gene expression in DSS treatment compared to homeostasis in WT-FMT mice **(A)**, *Lyz1*<sup>-/-</sup>-FMT mice **(B)**, and TG-FMT mice **(C)**. Genes in red- fold change > 1; p-value < 0.05. Genes in green- fold change < -1; p-value < 0.05. N=4 mice per group at steady state and N= 5 mice per group when treated with DSS. **(D-E)** Immunostaining of phosphorylated Stat3 **(D)** and phosphorylated Stat6 **(E)** in WT-FMT, *Lyz1*<sup>-/-</sup>-FMT, and TG-FMT DSS-treated colon tissues (N= 5 mice per group). **(F)** KEGG Pathway analysis showed distinct differences in pathways between WT-FMT and TG-FMT, in response to DSS-induced colitis.







**Fig. S7. Live and lysozyme-processed *R. gnavus* differentially mediates inflammatory tone, Related to Figure 7**

**(A)** Immunostaining of Alcian blue in the small intestinal sections of *Lyz1*<sup>-/-</sup> mice with varying abundance of *R. gnavus*. **(B)** Representative dot blots showed the cytokine expression profile of WT and *Lyz1*<sup>-/-</sup> MLNs stimulated by *R. gnavus* supernatant, lysozyme-treated *R. gnavus* supernatant, heat-killed *R. gnavus* supernatant, and lysozyme-treated LGG supernatant. Intestinal MLN cells were isolated from separately housed WT and *Lyz1*<sup>-/-</sup> littermates (N=2 for each genotype) **(C-F)** Radar plots compared expression levels of cytokines in WT **(C)** and *Lyz1*<sup>-/-</sup> MLNs **(D)** stimulated with lysozyme-treated *R. gnavus* sup and heat-killed *R. gnavus* sup and in WT **(E)** and *Lyz1*<sup>-/-</sup> **(F)** MLNs treated with lysozyme-treated *R. gnavus* sup and lysozyme-treated LGG sup. Data is representative of 2 independent experiments. **(G-H)** Quantification of pSTAT6 **(G)** and pSTAT3 **(H)** levels in WT (red bars) and *Lyz1*<sup>-/-</sup> (blue bars) MLN cells based on western blot analysis. The values are normalized to WT buffer. **(I, J)** Semi-quantitative PCR using species-specific primer sets confirmed successful colonization of Abx-treated mice with *R. gnavus* **(I)** or LGG **(J)**. **(K, L)** Real-time PCR analysis of Il25 and Il13 in the ileum of SPF and *R. gnavus* colonized WT and *Lyz1*<sup>-/-</sup> mice. (N=3 mice per genotype per group). **(M-O)** Immunostaining of Alcian blue (goblet cells) and Dclk1 (tuft cells) **(M)** and the quantification of goblet cell **(N)** and tuft cell **(O)** numbers in antibiotics-treated, *R. gnavus* colonized, and LGG-colonized WT and *Lyz1*<sup>-/-</sup> mice (N=3 mice per genotype for Abx and *R. gnavus* group and N=2 mice per genotype for LGG group). Data representative of 90-100 villi per section per mouse per genotype. **(P)** GSEA of RNA-seq data comparing Th2 signature in *R. gnavus* colonized *Lyz1*<sup>-/-</sup> mice and *R. gnavus* colonized WT mice (N=3 mice per genotype). All bar graphs display mean ± SEM.



| Name                          | WT=4 vs. <i>Lyz1</i> <sup>-/-</sup> =8 | WT=6 vs. TG=5   |
|-------------------------------|----------------------------------------|-----------------|
| Akkermansia muciniphila       | UP in <i>Lyz1</i> <sup>-/-</sup>       | Down in TG      |
| Anaerotruncus colihominis     | UP in <i>Lyz1</i> <sup>-/-</sup>       | Down in TG      |
| Clostridium sp                | UP in <i>Lyz1</i> <sup>-/-</sup>       | Down in TG      |
| Dorea formicigenerans         | UP in <i>Lyz1</i> <sup>-/-</sup>       | Down in TG      |
| Eubacterium plexicaudatum     | UP in <i>Lyz1</i> <sup>-/-</sup>       | Down in TG      |
| Lactobacillus reuteri         | UP in <i>Lyz1</i> <sup>-/-</sup>       | Down in TG      |
| Lactobacillus vaginalis       | UP in <i>Lyz1</i> <sup>-/-</sup>       | Down in TG      |
| Marvinbryantia formatexigens  | UP in <i>Lyz1</i> <sup>-/-</sup>       | Down in TG      |
| Moryella indoligenes          | UP in <i>Lyz1</i> <sup>-/-</sup>       | Down in TG      |
| Mucispirillum schaedleri      | UP in <i>Lyz1</i> <sup>-/-</sup>       | Down in TG      |
| Oscillibacter sp.             | UP in <i>Lyz1</i> <sup>-/-</sup>       | Down in TG      |
| Oscillibacter valericigenes   | UP in <i>Lyz1</i> <sup>-/-</sup>       | Down in TG      |
| Ruminococcus gnavus           | UP in <i>Lyz1</i> <sup>-/-</sup>       | Down in TG      |
| Acetatifactor muris           | UP in <i>Lyz1</i> <sup>-/-</sup>       | UP in TG        |
| Bifidobacterium pseudolongum  | UP in <i>Lyz1</i> <sup>-/-</sup>       | UP in TG        |
| Parvibacter caecicola         | UP in <i>Lyz1</i> <sup>-/-</sup>       | UP in TG        |
| Tyzzarella propionicum        | UP in <i>Lyz1</i> <sup>-/-</sup>       | UP in TG        |
| Clostridium viride            | UP in <i>Lyz1</i> <sup>-/-</sup>       | UP in TG        |
| Alistipes finegoldii          | UP in <i>Lyz1</i> <sup>-/-</sup>       | UNCHANGED in TG |
| Anaerostipes butyraticus      | UP in <i>Lyz1</i> <sup>-/-</sup>       | UNCHANGED in TG |
| Anaerostipes sp               | UP in <i>Lyz1</i> <sup>-/-</sup>       | UNCHANGED in TG |
| Bacteroides sp                | UP in <i>Lyz1</i> <sup>-/-</sup>       | UNCHANGED in TG |
| Bacteroides uniformis         | UP in <i>Lyz1</i> <sup>-/-</sup>       | UNCHANGED in TG |
| Coprococcus eutactus          | UP in <i>Lyz1</i> <sup>-/-</sup>       | UNCHANGED in TG |
| Eubacterium hadrum            | UP in <i>Lyz1</i> <sup>-/-</sup>       | UNCHANGED in TG |
| Eubacterium ramulus           | UP in <i>Lyz1</i> <sup>-/-</sup>       | UNCHANGED in TG |
| Faecalibacterium prausnitzii  | UP in <i>Lyz1</i> <sup>-/-</sup>       | UNCHANGED in TG |
| Helicobacter cf               | UP in <i>Lyz1</i> <sup>-/-</sup>       | UNCHANGED in TG |
| Helicobacter equorum          | UP in <i>Lyz1</i> <sup>-/-</sup>       | UNCHANGED in TG |
| Helicobacter ganmani          | UP in <i>Lyz1</i> <sup>-/-</sup>       | UNCHANGED in TG |
| Helicobacter sp               | UP in <i>Lyz1</i> <sup>-/-</sup>       | UNCHANGED in TG |
| Lachnoanaerobaculum umeasense | UP in <i>Lyz1</i> <sup>-/-</sup>       | UNCHANGED in TG |
| Oscillospira guilliermondii   | UP in <i>Lyz1</i> <sup>-/-</sup>       | UNCHANGED in TG |
| Ruminococcus gauvreauii       | UP in <i>Lyz1</i> <sup>-/-</sup>       | UNCHANGED in TG |
| Ruminococcus faecis           | UP in <i>Lyz1</i> <sup>-/-</sup>       | UNCHANGED in TG |
| Stomatobaculum longum         | UP in <i>Lyz1</i> <sup>-/-</sup>       | UNCHANGED in TG |

**Table. S1. Thirty-six species increased in *Lyz1*<sup>-/-</sup> mouse fecal microbiota. WT (N=4) vs. *Lyz1*<sup>-/-</sup> (N=8); WT (N=6) vs. TG (N=5), Related to Figure 5.**



| Ranked by<br><i>Lyz1</i> <sup>-/-</sup> % | Name                            | WT (%) | <i>Lyz1</i> <sup>-/-</sup><br>(%) | FC<br>(by %) | WT<br>(Counts) | <i>Lyz1</i> <sup>-/-</sup><br>(Counts) | FC (by<br>Counts) |
|-------------------------------------------|---------------------------------|--------|-----------------------------------|--------------|----------------|----------------------------------------|-------------------|
| 1                                         | Ruminococcus gnavus             | 3.66   | 6.01                              | 1.64         | 81498          | 284916                                 | 3.50              |
| 2                                         | Clostridium sp.                 | 1.00   | 1.43                              | 1.43         | 22233          | 67840                                  | 3.05              |
| 3                                         | Lactobacillus vaginalis         | 0.11   | 0.18                              | 1.67         | 2400           | 8539                                   | 3.56              |
| 4                                         | Dorea<br>formicigenerans        | 0.02   | 0.14                              | 8.94         | 351            | 6680                                   | 19.03             |
| 5                                         | Mucispirillum<br>schaedleri     | 0.03   | 0.12                              | 4.14         | 644            | 5674                                   | 8.81              |
| 6                                         | Akkermansia<br>muciniphila      | 0.05   | 0.06                              | 1.12         | 1206           | 2864                                   | 2.37              |
| 7                                         | Lactobacillus reuteri           | 0.03   | 0.06                              | 1.72         | 736            | 2689                                   | 3.65              |
| 8                                         | Moryella indoligenes            | 0.02   | 0.02                              | 1.16         | 459            | 1129                                   | 2.46              |
| 9                                         | Oscillibacter sp.               | 0.00   | 0.02                              | 4.73         | 104            | 1047                                   | 10.07             |
| 10                                        | Eubacterium<br>plexicaudatum    | 0.00   | 0.02                              | 45.00        | 10             | 958                                    | 95.80             |
| 11                                        | Oscillibacter<br>valericigenes  | 0.00   | 0.01                              | 3.62         | 71             | 547                                    | 7.70              |
| 12                                        | Anaerotruncus<br>colihominis    | 0.00   | 0.00                              | 4.70         | 22             | 220                                    | 10.00             |
| 13                                        | Marvinbryantia<br>formatexigens | 0.00   | 0.00                              | NA           | 0              | 62                                     | NA                |

  

| Ranked by WT<br>% | Name                            | WT (%) | TG (%) | FC (by<br>%) | WT<br>(Counts) | TG<br>(Counts) | FC (by<br>Counts) |
|-------------------|---------------------------------|--------|--------|--------------|----------------|----------------|-------------------|
| 1                 | Ruminococcus gnavus             | 1.72   | 1.19   | 0.69         | 81278          | 38622          | 0.48              |
| 2                 | Clostridium sp.                 | 0.83   | 0.53   | 0.64         | 39367          | 17278          | 0.44              |
| 3                 | Mucispirillum<br>schaedleri     | 0.18   | 0.02   | 0.12         | 8743           | 733            | 0.08              |
| 4                 | Dorea<br>formicigenerans        | 0.04   | 0.01   | 0.25         | 1898           | 321            | 0.17              |
| 5                 | Lactobacillus vaginalis         | 0.03   | 0.03   | 0.81         | 1500           | 833            | 0.56              |
| 6                 | Oscillibacter<br>valericigenes  | 0.03   | 0.01   | 0.24         | 1346           | 219            | 0.16              |
| 7                 | Akkermansia<br>muciniphila      | 0.02   | 0.01   | 0.22         | 1128           | 172            | 0.15              |
| 8                 | Oscillibacter sp.               | 0.01   | 0.01   | 0.57         | 496            | 193            | 0.39              |
| 9                 | Moryella indoligenes            | 0.01   | 0.01   | 0.74         | 340            | 174            | 0.51              |
| 10                | Lactobacillus reuteri           | 0.01   | 0.00   | 0.48         | 326            | 107            | 0.33              |
| 11                | Anaerotruncus<br>colihominis    | 0.01   | 0.00   | 0.46         | 281            | 88             | 0.31              |
| 12                | Eubacterium<br>plexicaudatum    | 0.00   | 0.00   | 0.00         | 140            | 0              | 0.00              |
| 13                | Marvinbryantia<br>formatexigens | 0.00   | 0.00   | NA           | 13             | 0              | NA                |

**Table. S2.** Thirteen species that increased in *Lyz1*<sup>-/-</sup> and decreased in TG mice were ranked by their abundance (%) in *Lyz1*<sup>-/-</sup> fecal microbiota. WT (N=4) vs. *Lyz1*<sup>-/-</sup> (N=8); WT (N=6) vs. TG (N=5), Related to Figure 5.



| Ranked by<br>Fecal KO % | Species                          | Fecal microbiota |                                   |      |        |        |      | Ileum luminal microbiota |                                   |       |
|-------------------------|----------------------------------|------------------|-----------------------------------|------|--------|--------|------|--------------------------|-----------------------------------|-------|
|                         |                                  | WT (%)           | <i>Lyz1</i> <sup>-/-</sup><br>(%) | FC   | WT (%) | TG (%) | FC   | WT (%)                   | <i>Lyz1</i> <sup>-/-</sup><br>(%) | FC    |
| 1                       | <i>R. gnavus</i>                 | 3.66             | 6.01                              | 1.64 | 1.72   | 1.19   | 0.69 | 0.00                     | 0.39                              | >39   |
| 2                       | <i>Clostridium sp.</i>           | 1.00             | 1.43                              | 1.43 | 0.83   | 0.53   | 0.64 | 0.031                    | 0.296                             | 9.68  |
| 3                       | <i>L. vaginalis</i><br><i>D.</i> | 0.11             | 0.18                              | 1.67 | 0.032  | 0.026  | 0.81 | 1.63                     | 0.61                              | 0.38  |
| 4                       | <i>formicigenerans</i>           | 0.02             | 0.14                              | 8.94 | 0.04   | 0.01   | 0.25 | 0.004                    | 0.05                              | 14.34 |
| 5                       | <i>M. schaedleri</i>             | 0.03             | 0.12                              | 4.14 | 0.18   | 0.02   | 0.12 | 0.00                     | 1.14                              | >114  |
| 6                       | <i>A. muciniphila</i>            | 0.05             | 0.06                              | 1.12 | 0.02   | 0.01   | 0.22 | 0.0003                   | 0.0008                            | 2.71  |
| 7                       | <i>L. reuteri</i>                | 0.03             | 0.06                              | 1.72 | 0.01   | 0.003  | 0.48 | 0.40                     | 0.23                              | 0.57  |
| 8                       | <i>M. indoligenes</i>            | 0.02             | 0.02                              | 1.16 | 0.007  | 0.005  | 0.74 | 0.0012                   | 0.0010                            | 0.86  |
| 9                       | <i>Oscillibacter sp.</i>         | 0.005            | 0.02                              | 4.73 | 0.010  | 0.006  | 0.57 | 0.00                     | 0.00                              | N/D   |

**Table. S3. Bacteria increased in *Lyz1*<sup>-/-</sup> and decreased in TG mice, Related to Figure 5.**



| Name                          | Fecal                            | Ileal luminal                    |
|-------------------------------|----------------------------------|----------------------------------|
| Acetatifactor muris           | Up in <i>Lyz1</i> <sup>-/-</sup> | Up in <i>Lyz1</i> <sup>-/-</sup> |
| Bifidobacterium pseudolongum  | Up in <i>Lyz1</i> <sup>-/-</sup> | Up in <i>Lyz1</i> <sup>-/-</sup> |
| Clostridium viride            | Up in <i>Lyz1</i> <sup>-/-</sup> | Up in <i>Lyz1</i> <sup>-/-</sup> |
| Coprococcus eutactus          | Up in <i>Lyz1</i> <sup>-/-</sup> | Up in <i>Lyz1</i> <sup>-/-</sup> |
| Dorea formicigenerans         | Up in <i>Lyz1</i> <sup>-/-</sup> | Up in <i>Lyz1</i> <sup>-/-</sup> |
| Eubacterium hadrum            | Up in <i>Lyz1</i> <sup>-/-</sup> | Up in <i>Lyz1</i> <sup>-/-</sup> |
| Faecalibacterium prausnitzii  | Up in <i>Lyz1</i> <sup>-/-</sup> | Up in <i>Lyz1</i> <sup>-/-</sup> |
| Helicobacter cf               | Up in <i>Lyz1</i> <sup>-/-</sup> | Up in <i>Lyz1</i> <sup>-/-</sup> |
| Helicobacter ganmani          | Up in <i>Lyz1</i> <sup>-/-</sup> | Up in <i>Lyz1</i> <sup>-/-</sup> |
| Mucispirillum schaedleri      | Up in <i>Lyz1</i> <sup>-/-</sup> | Up in <i>Lyz1</i> <sup>-/-</sup> |
| Oscillibacter valericigenes   | Up in <i>Lyz1</i> <sup>-/-</sup> | Up in <i>Lyz1</i> <sup>-/-</sup> |
| Ruminococcus gnavus           | Up in <i>Lyz1</i> <sup>-/-</sup> | Up in <i>Lyz1</i> <sup>-/-</sup> |
| Tyzzarella propionicum        | Up in <i>Lyz1</i> <sup>-/-</sup> | Up in <i>Lyz1</i> <sup>-/-</sup> |
| Clostridium sp                | Up in <i>Lyz1</i> <sup>-/-</sup> | Up in <i>Lyz1</i> <sup>-/-</sup> |
| Akkermansia muciniphila       | Up in <i>Lyz1</i> <sup>-/-</sup> | Unchanged                        |
| Eubacterium ramulus           | Up in <i>Lyz1</i> <sup>-/-</sup> | Unchanged                        |
| Helicobacter equorum          | Up in <i>Lyz1</i> <sup>-/-</sup> | Unchanged                        |
| Helicobacter sp               | Up in <i>Lyz1</i> <sup>-/-</sup> | Unchanged                        |
| Marvinbryantia formatexigens  | Up in <i>Lyz1</i> <sup>-/-</sup> | Unchanged                        |
| Oscillibacter sp.             | Up in <i>Lyz1</i> <sup>-/-</sup> | Unchanged                        |
| Ruminococcus gauvreauii       | Up in <i>Lyz1</i> <sup>-/-</sup> | Unchanged                        |
| Bacteroides uniformis         | Up in <i>Lyz1</i> <sup>-/-</sup> | Unchanged                        |
| Lactobacillus reuteri         | Up in <i>Lyz1</i> <sup>-/-</sup> | Unchanged                        |
| Lactobacillus vaginalis       | Up in <i>Lyz1</i> <sup>-/-</sup> | Unchanged                        |
| Moryella indoligenes          | Up in <i>Lyz1</i> <sup>-/-</sup> | Unchanged                        |
| Parvibacter caecicola         | Up in <i>Lyz1</i> <sup>-/-</sup> | Unchanged                        |
| Alistipes finegoldii          | Up in <i>Lyz1</i> <sup>-/-</sup> | N/D                              |
| Anaerostipes butyraticus      | Up in <i>Lyz1</i> <sup>-/-</sup> | N/D                              |
| Anaerostipes sp               | Up in <i>Lyz1</i> <sup>-/-</sup> | N/D                              |
| Anaerotruncus colihominis     | Up in <i>Lyz1</i> <sup>-/-</sup> | N/D                              |
| Bacteroides sp                | Up in <i>Lyz1</i> <sup>-/-</sup> | N/D                              |
| Eubacterium plexicaudatum     | Up in <i>Lyz1</i> <sup>-/-</sup> | N/D                              |
| Lachnoanaerobaculum umeasense | Up in <i>Lyz1</i> <sup>-/-</sup> | N/D                              |
| Oscillospira guilliermondii   | Up in <i>Lyz1</i> <sup>-/-</sup> | N/D                              |
| Ruminococcus faecis           | Up in <i>Lyz1</i> <sup>-/-</sup> | N/D                              |
| Stomatobaculum longum         | Up in <i>Lyz1</i> <sup>-/-</sup> | N/D                              |

**Table. S4. Thirty-six species increased in *Lyz1*<sup>-/-</sup> mouse fecal microbiota. WT (N=4) vs. *Lyz1*<sup>-/-</sup> (N=8) Fecal microbiota; WT (N=4) vs. *Lyz1*<sup>-/-</sup> (N=6) ileal luminal content, Related to Figure 5.**



| Ranked by<br>WT % | Species                     | WT (%) | TG (%) | FC (by<br>%) | WT<br>(Counts) | TG<br>(Counts) | FC (by<br>Counts) |
|-------------------|-----------------------------|--------|--------|--------------|----------------|----------------|-------------------|
| 1                 | Lactobacillus<br>murinus    | 0.09   | 0.43   | 5.05         | 4079           | 14144          | 3.47              |
| 2                 | Candidatus<br>Arthromitus   | 0.02   | 0.02   | 1.19         | 873            | 716            | 0.82              |
| 3                 | Lactobacillus<br>animalis   | 0.01   | 0.02   | 1.64         | 587            | 663            | 1.13              |
| 4                 | Clostridium<br>perfringens  | 0.00   | 0.01   | 8.16         | 61             | 342            | 5.61              |
| 5                 | Enterorhabdus<br>caecimuris | 0.00   | 0.01   | 4.72         | 53             | 172            | 3.25              |
| 6                 | Roseburia faecis            | 0.00   | 0.00   | 7.22         | 24             | 119            | 4.96              |
| 7                 | Enterorhabdus<br>mucosicola | 0.00   | 0.00   | 1.19         | 65             | 53             | 0.82              |

  

| Ranked by<br>TG % | Species                     | WT (%) | <i>Lyz1</i> <sup>-/-</sup> (%) | FC (by<br>%) | WT<br>(Counts) | <i>Lyz1</i> <sup>-/-</sup><br>(Counts) | FC (by<br>Counts) |
|-------------------|-----------------------------|--------|--------------------------------|--------------|----------------|----------------------------------------|-------------------|
| 1                 | Roseburia faecis            | 0.17   | 0.07                           | 0.41         | 3747           | 3253                                   | 0.87              |
| 2                 | Lactobacillus<br>murinus    | 0.13   | 0.05                           | 0.37         | 3004           | 2361                                   | 0.79              |
| 3                 | Clostridium<br>perfringens  | 0.10   | 0.02                           | 0.17         | 2158           | 777                                    | 0.36              |
| 4                 | Enterorhabdus<br>caecimuris | 0.04   | 0.02                           | 0.60         | 881            | 1126                                   | 1.28              |
| 5                 | Candidatus<br>Arthromitus*  | 0.04   | 0.00                           | NA           | 3646           | 63                                     | 0.02              |
| 6                 | Lactobacillus<br>animalis   | 0.03   | 0.00                           | 0.15         | 649            | 208                                    | 0.32              |
| 7                 | Enterorhabdus<br>mucosicola | 0.00   | 0.00                           | 0.00         | 13             | 0                                      | 0.00              |

**Table. S5. Seven species increased in TG and decreased in *Lyz1*<sup>-/-</sup> mice. WT (N=6) vs. TG (N=5); WT (N=4) vs. *Lyz1*<sup>-/-</sup> (N=8), Related to Figure 5.**



|                                       | L-YHBHI.4<br>Concentration (g/L) | L-YHBHI.4 + mucin<br>Concentration (g/L) | DP2<br>Concentration (g/L) |
|---------------------------------------|----------------------------------|------------------------------------------|----------------------------|
| Brain Heart Infusion                  | 37                               | 37                                       | -                          |
| Yeast Extract                         | 5                                | 5                                        | -                          |
| Maltose                               | 0,50                             | 0,50                                     | -                          |
| Cellobiose                            | 0,50                             | 0,50                                     | -                          |
| Starch                                | 0,50                             | 0,50                                     | -                          |
| Mucin type II                         | -                                | 1                                        | -                          |
| L-Cystéine-HCl                        | 0,5                              | 0,5                                      | 0.5                        |
| Hemin 0.5%                            | 0.005                            | 0.005                                    | 0.005                      |
| Resazurin solution 0.1%               | 0.004                            | 0.004                                    | 0.004                      |
| Meat extract                          |                                  |                                          | 5                          |
| Sodium Pyruvate                       |                                  |                                          | 1                          |
| Sodium Succinate                      |                                  |                                          | 5                          |
| Bactopeptone                          |                                  |                                          | 5                          |
| CaCl <sub>2</sub> , 2H <sub>2</sub> O |                                  |                                          | 0.01                       |
| KH <sub>2</sub> PO <sub>4</sub>       |                                  |                                          | 0.04                       |
| K <sub>2</sub> HPO <sub>4</sub>       |                                  |                                          | 0.04                       |
| NaCl                                  |                                  |                                          | 0.08                       |
| ZnSO <sub>4</sub> , 7H <sub>2</sub> O |                                  |                                          | 0.02                       |
| NaHCO <sub>3</sub>                    |                                  |                                          | 0.4                        |
| Vitamins                              |                                  |                                          |                            |
| -K1                                   |                                  |                                          | 1.10 <sup>-6</sup>         |
| -B1                                   |                                  |                                          | 5.10 <sup>-5</sup>         |
| -B2                                   |                                  |                                          | 5.10 <sup>-5</sup>         |
| -B8                                   |                                  |                                          | 2.10 <sup>-5</sup>         |

**Table. S6. Detailed composition of the bacteria culture media used *Ruminococcus gnavus*, Related to STAR Methods.**



| <b>Gene name</b>             | <b>Forward primer</b>    | <b>Reverse primer</b>   |
|------------------------------|--------------------------|-------------------------|
| <i>Dorea formicigenerans</i> | GCAGCTAACGCAATAAGCAG     | CTTCCATTACGAAGCGGTC     |
| <i>Ruminococcus gnavus</i>   | GGACTGCATTTGGAAGTGTGTCAG | AACGTCAGTCATCGTCCAGAAAG |
| <i>Bacterial 16s rRNA</i>    | ACTACGTGCCAGCAGCC        | GGACTACCAGGGTATCTAATCC  |
| <i>Tritrichomonas muris</i>  | GCTTTTGCAAGCTAGGTCCC     | TTTCTGATGGGGCGTACCAC    |
| Mouse Lyz1                   | ATGGCTACCGTGGTGTCAAG     | CGGTCTCCACGGTTGTAGTT    |
| Mouse Mucin 2 (Muc2)         | TGTGTGGGACCTGACAATGT     | CACACAATGCCACTTCCACC    |
| Mouse Klf4                   | CACACCTGCGAACTCACAC      | GGTAGTGCCTGGTCAGTTCA    |
| Mouse Spdef                  | CTATGGCCGCTTCATCCGCT     | GTTCTTGCGCACACCCAC      |
| Mouse Il4                    | AGTGTTCTCATGGAGCTGCA     | CAGTGATGTGGACTTGGACTCA  |
| Mouse Il13                   | CGGTGCCAAGATCTGTGTCT     | ACACTCCATACCATGCTGCC    |
| Mouse Il17a                  | GTTCCACGTCACCCTGGACT     | CTTTCCCTCCGCATTGACAC    |
| Mouse Il17f                  | ACGTGAATTCCAGAACCGCT     | TGATGCAGCCTGAGTGTCTG    |
| Mouse Il25                   | ACACCCACCACGCAGAAT       | ACCCGATTCAAGTCCCTGTC    |
| Mouse Il33                   | TGGGAAGAAGCTGATGGTGA     | CGAGACGTCACCCCTTTGAA    |
| Mouse Tslp                   | CCTTCACTCCCCGACAAAAC     | TGCCATTTCTGAGTACCGT     |
| Mouse Tnfa                   | ACAAGCCTGTAGCCCACGTC     | CTTTGAGATCCATGCCGTTG    |
| Mouse Pou2f3                 | ACCCATCTACAACCTCCCGGC    | CCAGGGGAACAGGATGACGT    |
| Mouse Gata3                  | GAGGAGGAACGCTAATGGGG     | CGGGTCTGGATGCCTTCTTT    |
| Mouse Tbx21 (Tbx)            | GGCTTCCAACAATGTGACCC     | TGTTAGAAGCACTGCAGGCA    |
| Mouse Rorc (Roryt)           | GTGTGCTGTCCTGGGCTAC      | CCCAGATGACTTGTCCCCAC    |
| Mouse Foxp3                  | TGGAAAAGGAGAAGCTGGGAG    | AGTACTGGTGGCTACGATGC    |
| Mouse Tgfb1                  | CGGAGAGCCCTGGATACCA      | CTTCCAACCCAGGTCCTTCC    |
| Mouse Amphiregulin (Areg)    | CGGCATCGTTATCACAGTGC     | TGCACAGTCCCGTTTTCTTG    |
| Mouse Hpvt                   | TCCCTGGTTAAGCAGTACAGC    | TCCAACAAAGTCTGGCCTGT    |

**Table. S7. Primer list for quantitative RT-PCR, Related to STAR Methods.**
